## 17 Abstract

18 Neuromodulators, such as neuropeptides, can regulate and reconfigure neural circuits to alter their output,  
19 affecting in this way animal physiology and behavior. The interplay between the activity of neuronal circuits, their  
20 modulation by neuropeptides, and the resulting behavior, is still poorly understood. Here, we present a  
21 quantitative framework to study the relationships between the temporal pattern of activity of peptidergic neurons  
22 and of motoneurons during *Drosophila* ecdysis behavior, a highly stereotyped motor sequence that is critical for  
23 insect growth. We analyzed, in the time and frequency domains, simultaneous intracellular calcium recordings of  
24 peptidergic CCAP (crustacean cardioactive peptide) neurons and motoneurons obtained from isolated central  
25 nervous systems throughout fictive ecdysis behavior induced *ex vivo* by Ecdysis triggering hormone. We found  
26 that the activity of both neuronal populations is tightly coupled in a cross-frequency manner, suggesting that  
27 CCAP neurons modulate the faster oscillation of motoneurons. To explore this idea further, we used a  
28 probabilistic logistic model to show that calcium dynamics in CCAP neurons can predict the oscillation of  
29 motoneurons, both in a simple model and in a conductance-base model capable of simulating many of the  
30 observed neural dynamics features. Finally, we developed an algorithm to quantify the motor behavior observed  
31 in videos of pupal ecdysis, and compared their features to the patterns of neuronal calcium activity recorded *ex*  
32 *vivo*. We found that the motor activity of the intact animal is more regular than the motoneuronal activity recorded  
33 from the *ex vivo* preparations during fictive ecdysis behavior; the analysis of movement patterns also allowed us  
34 to identify a new post-ecdysis phase.

## 35 Author Summary

36 Repetitive movements such as walking, swimming, and flying are controlled by networks of neurons known as  
37 central patten generators. In many cases, the exact pattern of activity is modulated by neuropeptides, which are  
38 small signaling molecules that, unlike neurotransmitters, are broadly released within regions of the nervous  
39 system. Because of this mode of action, it can be difficult to discern the relationship between the temporal pattern  
40 of firing of peptidergic neurons and the timing of the resulting motor behavior. Here, we developed methods to  
41 analyze the patterns of activity of such weakly coupled systems as applied to ecdysis, the stereotyped sequence  
42 of behaviors used by insects to shed the remains of their old exoskeleton at the end of every molt. Key actors in

43 this process are motoneurons (MN) and a set of neurons expressing the neuropeptide, Crustacean Cardioactive  
44 Peptide (CCAP). Combining real-time calcium imaging, frequency analysis, computational simulations, and image  
45 processing, we determined the relationships between the activity of CCAP neurons and the resulting motor output  
46 during pupal ecdysis in the fruit fly, *Drosophila melanogaster*. We found that several temporal features of the  
47 activity of CCAP neurons are highly coupled to the pattern of activity motoneuronal pattern, suggesting an active  
48 role of CCAP neurons during ecdysis. We also developed quantitative approaches that allowed us to identify a  
49 new ecdysis sub-phase.

50

## 51 Introduction

52 Oscillatory neural circuits are important for many brain processes including memory formation [1,2], sensory  
53 representation [3–6], and rhythmic pattern generation [7,8]. Rhythmic movements are controlled by neuronal  
54 networks that time the firing of motoneuron discharges, which then cause a sequence of organized movements.  
55 In order to generate organized behaviors, it is necessary to coordinate dynamically the interaction of local and  
56 sparse brain circuits [9,10]. How these dynamic properties are tuned can profoundly influence the functional  
57 connectivity that defines the structure of neural circuits orchestrating behaviors. In this context, neuromodulators  
58 such as neuropeptides have been shown to play a major role in regulating and coordinating network functions in a  
59 number of processes including feeding, sleep, courtship, stress, learning and memory, amongst others [11–16].

60 Centrally coordinated innate behaviors have provided a useful model to study the molecules, neurons, and  
61 networks that organize sequential and rhythmic behaviors. One innate behavior that has been used for these  
62 studies is insect ecdysis, which is a stereotyped sequence of three motor programs (pre-ecdysis, ecdysis itself,  
63 and post-ecdysis) that is required to shed the remains of the old cuticle (exoskeleton) at the end of each molt [17–  
64 19]. Multiple neuropeptidergic circuits have been implicated in the regulation of the ecdysis but their precise roles  
65 are still poorly understood. Ecdysis begins with the release into the circulatory system (hemolymph) of the  
66 Ecdysis Triggering Hormone (ETH), which is synthesized and released from peripheral endocrine Inka cells [20].  
67 Once ETH reaches the Central Nervous System (CNS) it sequentially activates several neuropeptidergic targets,  
68 where the network expressing the Crustacean Cardioactive Peptide (CCAP) has been suggested to be a critical

69 node for the generation of the ecdysial motor pattern [21–27]. However, the mechanisms by which the pattern of  
70 activity of the CCAP network is then translated into a motor output are not fully understood.

71 Recent advances in imaging technology enable the recording of neuronal activity in large regions of the brain  
72 including hundreds of neurons, thereby providing new ways to study circuit dynamics and behavior. Nevertheless,  
73 it remains challenging to extract quantitative information from such large data sets. It is thus necessary to develop  
74 suitable algorithms to determine the time windows in which specific motor activity occurs, and to identify the  
75 neurons that show activity related to the initiation and termination of a motor pattern. Previous approaches have  
76 used different methods to quantitatively classify neuronal activity patterns, which include principal components  
77 analysis (PCA), independent components analysis (ICA), singular-value decomposition (SVD), and k-means  
78 clustering, [28–30]. These methods have been widely used but they are often restricted to specific datasets.  
79 Therefore, the generation of more general methods would be of great utility to the field.

80 Here, we report on the implementation of new computational approaches to decode the signal dynamics driving  
81 ecdysis in the fruitfly, *Drosophila melanogaster*. We used mathematical methods and models to simultaneously  
82 analyze calcium imaging of CCAP neurons and motoneuron activity during the behavior. Although the pattern and  
83 the timing of activity of these two populations of neurons differed significantly, we were able to show that the  
84 activity of CCAP neurons is functionally tightly coupled to that of the motoneurons during the ecdysis and post-  
85 ecdysis phases, in a cross-frequency manner. This allowed us to fit a probabilistic logistic model to the  
86 experimental data in order to predict the times when motoneurons had a high chance of oscillating. We also  
87 generated a conductance-based model that simulates many of the experimentally features observed. Finally, we  
88 developed an algorithm that extracts the major traits of ecdysis behaviors, allowing us to quantify the movements  
89 that occur during the behavior of the intact animal and contrast them with the *ex vivo* recorded motoneural  
90 activity. This algorithm also allowed us to identify a new sub-phase within the post-ecdysis period. In summary,  
91 we describe a series of methods to quantify and correlate patterns of neuronal activity with differing temporal  
92 characteristics that occur during the expression of a stereotyped behavior. Using these methods, we show that  
93 the CCAP network tightly regulates motoneuronal activity through the execution of the entire ecdysis and post-  
94 ecdysis routines.

95

## 96 RESULTS

### 97 INDIVIDUAL DYNAMICS OF CCAP-EXPRESSING NEURONS AND MOTONEURONS

98 The pattern of neural activity that corresponds to ecdysis behavior can be elicited in *ex vivo* preparations of *D.*  
99 *melanogaster* CNS by exposure to ETH. We followed this approach using CNSs from animals just prior to pupal  
100 ecdysis, which expressed the genetically-encoded calcium sensor GCaMP3.2 (as a proxy for neural activity),  
101 either in CCAP neurons or in both CCAP neurons and motoneurons (Fig 1a, b, c). As has previously been  
102 reported [22,25], increases in GCaMP signal typically began 20 minutes after stimulation with ETH, around the  
103 time of ecdysis phase is induced in intact pupae. During this phase, CCAP neurons and motoneurons display  
104 higher levels of activity, which then falls after entering the post-ecdysis phase.

#### 105 Fig 1: CCAP neuron and motoneuron activity

106 **(a)** Single-plane calcium imaging of GCaMP3.2-expressing CCAP neurons. **(b)** Projection of 5 images from  
107 different planes, of GCaMP3.2-expressing CCAP neurons and motoneurons. **(c)** Time series of signal from  
108 calcium sensor of AN1-AN4  $\alpha$  CCAP neurons and motoneurons recorded from a single CNS; time zero  
109 corresponds to moment of ETH-stimulation. The letter indicates the side (left [L] and right [R]), while the number  
110 indicates the abdominal segment of the neurons. **(d)** Mean time of onset of  $\alpha$  CCAP neuron and motoneuron  
111 activity, for each of 9 separate experiments, showing temporally close values between populations. “MN” and  
112 “CCAP” indicate motoneurons and  $\alpha$  CCAP neurons, respectively. \*\*: p-value < 0.01, \*\*\*: p-value < 0.001.

113

114 CCAP neurons can be divided into  $\alpha$  and  $\beta$  neurons depending on their location and their activity pattern [25].  
115 Here, we mostly focused on the  $\alpha$  type, because  $\beta$  neurons appeared to display a low pass-filtered version of the  
116  $\alpha$  activity. Regarding motoneurons, we divided them into left and right regions, as there were no major differences  
117 in the activity between sides. Grouping them also increased the signal-to-noise ratio (SNR), making the task of  
118 comparing different experiments easier.

119 In the intact animal, the onset of left-right alternating motoneuronal activity corresponds to the beginning of the  
120 ecdysial phase proper of the ecdysis motor sequence [22,25]. As a first approach to characterize the dynamics of  
121 CCAP neuron and motoneuron activity, we computed the onset of their activity in preparations in which both

122 classes of neurons expressed the GCaMP3.2 calcium sensor. The mean onset time after ETH challenge was  
123  $1176 \pm 37.9$  s for the  $\alpha$  CCAP neurons and  $1149 \pm 61.5$  s for the motoneurons (Fig 1d) ( $n = 9$ ).

124 The mean onset of activity in  $\alpha$  CCAP neurons and motoneurons tended to be temporally correlated. Indeed, for  
125 all experiments except one, the onset of activity in  $\alpha$  CCAP neurons and in motoneurons was significantly close in  
126 time ( $p$ -values  $< 0.01$ ; one-tailed Mann-Whitney U test). In contrast, when comparing the onset time of  $\alpha$  CCAP  
127 and motoneurons from different experiments, we found that they were more temporally separated. In addition, the  
128 onset of motoneuron activity usually lagged behind that for CCAP neurons, suggesting that some level of  $\alpha$  CCAP  
129 activity is required to initiate the motoneuronal oscillatory activity.

130 Next, we computed the period of the oscillations of both populations of neurons using the continuous wavelet  
131 transform (CWT). This method was preferred over the Fourier transform, as CWT can localize the frequency  
132 components in time. The average scaleograms of all  $\alpha$  CCAP neurons ( $n = 111$ ) (Fig 2a) and motoneuron time  
133 series ( $n = 18$ ) (Fig 2b) showed that the main oscillatory period was around 50 to 200 s for  $\alpha$  CCAP neurons, and  
134 around 25 to 50 s for motoneurons.

135

### 136 **Fig 2: Oscillation period of CCAP neurons and motoneurons**

137 **(a, b)** Average scaleogram for all  $\alpha$  CCAP neuron **(a)** and motoneuron time series **(b)**. **(c)** Mean oscillation  
138 periods of CCAP neurons and motoneurons for all 9 experiments. For CCAPs, only the data for neurons that  
139 passed the selection criteria are shown (see text). In some experiments none were accepted, and the bar is  
140 missing. By contrast, in all experiments motoneurons of the left and right regions showed a dominant oscillation  
141 period.

142

143 Nevertheless, not all  $\alpha$  CCAP neurons showed a clear single dominant frequency component. Applying a criterion  
144 for the existence of predominant peaks in the frequency spectrum (minimum amplitude at each side of the interval  
145 that goes from half to twice the period of the maximum amplitude, to be less than 80% of the maximum) we found  
146 that only 47% of the  $\alpha$  CCAP neurons passed the selection criterion, illustrating the irregularity of the oscillatory  
147 activity in these neurons. Neurons that passed this criterion were used to compute the mean period of each

148 experiment ( $166 \pm 23.3$  s;  $n = 13$  experiments); the remaining neurons were eliminated from further frequency  
149 analysis.

150 By contrast to CCAP neurons, motoneurons displayed a more regular pattern of activity with a clearer main  
151 oscillatory component, and no motoneuron time-series was discarded. The main oscillatory period of  
152 motoneurons was  $33.4 \pm 4.1$  s ( $n = 9$ ). The difference in the principal oscillatory period between the left and right  
153 sides was also small, suggesting that the activity of motoneurons on both sides is not independent. We plotted the  
154 periods of both CCAP and motoneurons and their means (Fig 2c), and in all experiments found that the period of  
155 motoneuron activity was much shorter than that of CCAP neurons.

156

### 157 COORDINATION WITHIN CCAP EXPRESSING NEURONS

158 To investigate the coordination between CCAP neurons, we measured the linear relationship between their time  
159 series using Pearson's correlation. We grouped the correlation pairs into functionally equivalent pairs based on  
160 what is known about their anatomy, as well as their synaptic and peptidergic connectivity [31,32]. Thus, the  
161 correlation pairs were grouped into: contralateral neurons (on the same segment but opposite sides), ipsilateral  
162 neurons (on the same side but in different segments), and "other" neuron pairs (on opposite sides and on a  
163 different segments) (see Fig 3a). We computed the group p-values using the one-tailed Mann-Whitney U test to  
164 compare correlations of each experiment to null cross-experiment correlations. In all cases we obtained p-values  
165  $< 0.001$  making group correlations shown in Fig 3b-f highly significant.

166

### 167 Fig 3: CCAP neuron coordination

168 **(a)** Pearson's correlations pairs are divided into 3 groups: contralateral neurons ("C"), ipsilateral neurons ("I"), and  
169 "others" ("O"). As an example, the graph shows pairs that include the left AN2 neuron. **(b-j)** Correlation  
170 coefficients between the time series of CCAP neurons, shown as violin plots with their minimum, maximum and  
171 mean values. **(b)**  $\alpha$  CCAP neuron correlations in the time domain. **(c)**  $\beta$  CCAP neuron correlations in the time  
172 domain. **(d)**  $\alpha$ - $\beta$  CCAP neuron correlations in the time domain. **(e)** Correlations of  $\alpha$  CCAP neuron amplitude of  
173 oscillations in the time-frequency domain. **(f)** Correlation of  $\alpha$  CCAP neuron amplitude and phase in the time-

174 frequency domain. **(g-j)** Correlation between ipsilateral pairs with different segmental separation, “I1”, “I2” and  
175 “I3” groups are contiguous, separated by 1 and separated by 2 segments, respectively. The plots use the same  
176 notation as the plots in **(b-f)**. \*: p-value < 0.05, \*\*: p-value < 0.01, \*\*\*: p-value < 0.001.

177

178 Correlations between contralateral CCAP neurons were higher than between ipsilateral neurons, for  $\alpha\alpha$  and  $\alpha\beta$   
179 pairs (Fig 3b,c,d). The correlations between contralateral neurons were also higher than between “other” neurons  
180 for  $\alpha\alpha$ ,  $\beta\beta$  and  $\alpha\beta$  pairs. To test if the distance (in segments) between neurons affected the strength of the  
181 coupling, we divided the pairs into 3 ipsilateral groups based on their segment separation. The I1, I2 and I3  
182 groups contain ipsilateral pairs of neurons within the same segment, or pairs separated by 1 or by 2 segments,  
183 respectively. We performed the same analyses on these groups (Fig 3g-j), and found that correlation for both  $\alpha\alpha$   
184 and  $\alpha\beta$  neuron pairs dropped as the segmental distance between them increased (Fig 3i,j). In contrast,  
185 coordination between  $\beta\beta$  neuron pairs was not affected by segmental distance (Fig 3h).

186 Finally, we studied the correlation of the  $\alpha\alpha$  pairs in the time-frequency domain, using the 50 to 200 s period band  
187 of the CWT. This also allowed us to study the correlation of the oscillation’s amplitude with and without the phase  
188 component. We found that contralateral neurons had a higher correlation of amplitudes (absolute value of the  
189 CWT) compared to the other pairs (Fig 3e). When taking into account the phase component (the real part of the  
190 CWT) the correlation coefficients displayed an important drop, showing that the phase of the oscillations was  
191 poorly coordinated (Fig 3f). The interpretation of these results is that CCAP neurons tend to be active at the same  
192 time but do not oscillate with the same phase.

193 These results show that all abdominal segments 1-4 (AN1-AN4) CCAP neurons tend to have synchronized  
194 activity, but that their coupling strength varies depending on the neuronal pair considered. Contralateral  $\alpha\alpha$  and  $\alpha\beta$   
195 pairs from the same segment appear to show higher coupling, whereas  $\beta\beta$  pairs show similar contralateral and  
196 ipsilateral coupling strength. Finally, the correlated activity does not involve a synchronized oscillation, i.e. CCAP  
197 neurons oscillate at the same time but not in a concerted fashion.

198



## 199 COORDINATION BETWEEN MOTONEURONS

200 Left and right motoneuronal regions express coordinated but opposite activity. In order to quantify this  
201 coordination and determine how it evolves over time, we calculated the Pearson's correlation between left and  
202 right motoneuron regions on a sliding window of 100 s (thus the window is longer than the oscillation period, but  
203 shorter than the duration of oscillation bursts). The correlations tended to be negative during the oscillating  
204 periods and positive during the non-oscillating periods (Fig 4a), consistent with the observed synchronous but  
205 phase-opposite behavior.

206

### 207 **Fig 4: Motoneuronal coordination**

208 **(a)** Correlation coefficients between left and right motoneuron time series, calculated over a sliding window of 100  
209 s. Time series for left ("MN L") and right ("MN R") motoneuronal regions are shown in orange and purple,  
210 respectively, and the Pearson's correlation coefficient ("r") of the sliding window is shown in black. Gray horizontal  
211 lines indicate correlations of -1, 0 and +1. **(b)** Example of the method used to compute the mean phase  
212 difference of an experimental recording. Blue and green points represent the phase difference at every instant of  
213 the experiment; their amplitude is scaled to the mean amplitude of the oscillations of the left and right region. The  
214 red point represents the mean vector, whose phase represents the mean phase difference of the experiment. **(c)**  
215 Mean phase difference for 9 experiments (blue) and mean for all experiments (red).

216

217 We then used the CWT to compute the instantaneous amplitude and phase of the motoneurons' primary  
218 oscillatory period for the entire recording. We generated vectors with angles equal to the phase difference and  
219 lengths equal to the mean amplitude of their CWT, computing the phase difference of the regions by averaging all  
220 the vectors of the experiment (Fig 4b).

221 Using this procedure, we found a large amount of variability in the phase difference within each experiment, and  
222 an important spread of the experimental mean phase difference (Fig 4c), with a global mean of  $182.1 \pm 14.6^\circ$ .

223 The fact that the motoneurons oscillate in antiphase is compatible with the existence of a central pattern  
224 generator (CPG) downstream of the CCAP neurons [27]. The variability in the phase difference could be an

225 indicator that the CPG imaged in the calcium imaging preparations has difficulty synchronizing left and right  
226 motoneurons in the absence of sensory feedback, analogous to what has been shown previously for *Drosophila*  
227 larval crawling behavior [33].

228

## 229 FUNCTIONAL CONNECTIVITY BETWEEN CCAP NEURONS AND MOTONEURONS

230 We noticed that  $\alpha$  CCAP neurons appear to modulate the amplitude of the motoneuronal activity, with high levels  
231 of  $\alpha$  CCAP neuron fluorescence tending to match periods of motoneuronal oscillation. Based on this observation,  
232 we converted the motoneuronal signal so that it could be correlated quantitatively to that of CCAP neurons. For  
233 this we used a single motoneuronal signal made by subtracting the time series of one region from the other. This  
234 procedure reduced the common noise and increased the SNR and oscillation amplitude, without much loss of  
235 information as the two-time series are mostly redundant.

236 We computed the absolute value of the CWT of the motoneuronal signal at its previously computed primary  
237 oscillatory period, thus extracting the instantaneous amplitude (**Error! Reference source not found.a**). The  
238 amplitude signal from the motoneuronal oscillation was then correlated using Pearson's correlation to each  $\alpha$   
239 CCAP neuron time series. The significance of the within-experiment correlations, as compared to null cross-  
240 experiment correlations, was tested using a one-tailed Mann-Whitney U test. For all experiments except one, the  
241 correlations were significant (Fig 5b). The single experiment that did not display significant correlations showed  
242 post-ecdysis motoneuronal oscillations that did not match temporally the increases in  $\alpha$  CCAP neuron activity.

243

### 244 Fig 5: Correlation between $\alpha$ CCAP neuron and motoneuron activity

245 **(a)** Orange and purple lines show the activity of the left ("MN L") and right ("MN R") motoneuron regions,  
246 respectively, and the black line ("Activity") shows the amplitude of the motoneuron signal. **(b)** Correlation  
247 coefficients between  $\alpha$  CCAP neurons and the amplitude of the motoneuronal time series, shown as points and  
248 the means as bars. **(c)** Analogous to **(b)**, but with the pre-ecdysis phase removed. \*: p-value < 0.05, \*\*: p-value <  
249 0.01, \*\*\*: p-value < 0.001.

250

251 As the time of onset of activity varied across experiments, it could be argued that the high significance of the  
252 correlation between  $\alpha$  CCAP neurons and motoneurons is caused by the matching of onset times. To test this  
253 hypothesis, we removed the initial non-oscillatory block for each experiment and repeated the analysis using the  
254 modified time series (**Error! Reference source not found.c**). For all experiments except two, the results were  
255 significant, suggesting that  $\alpha$  CCAP neurons regulate the motoneuronal activity during the entire recording period.

256 These results suggest that the CPG responsible for ecdysis requires a constant input from the  $\alpha$  CCAP neurons to  
257 maintain its ongoing oscillatory activity, consistent with previous findings [21,27]. Also, the correlated activity  
258 allows us to talk of *functional connectivity* [34] that occurs between CCAP and motoneurons, regardless of  
259 whether there is a structural connectivity (synapses) between them.

260

## 261 FITTING THE CCAP-MOTONEURON INTERACTION WITH A LOGISTIC MODEL

262 After finding that CCAP neurons are functionally coupled to the motoneurons, we built a model to test how well  
263 the activity of the  $\alpha$  CCAP neurons could predict the motoneuronal oscillatory state.

264 The model takes the activity of  $\alpha$  CCAP neurons as input and generates the motoneuronal oscillatory activity as  
265 output. As the amplitude of the motoneuron oscillations does not appear to be regulated by  $\alpha$  CCAP neurons, we  
266 employed a binary signal obtained by thresholding the oscillation amplitude (see Methods) to describe the  
267 oscillatory and non-oscillatory motoneuronal activity. The motoneuron oscillation generator (CPG) integrates the  
268 signals from AN1-AN4  $\alpha$  CCAP neurons and produces a probabilistic oscillatory response.

269 The system was modeled as a logistic regression:

$$270 \quad p(t) = \frac{1}{1 + \exp(-\beta - \sum_{i=1}^8 w_i f_i(t))}$$

271 Where  $p(t)$  represents the probability that motoneurons will oscillate at time  $t$ ;  $f_i(t)$  the  $i$ -th  $\alpha$  CCAP neuron time  
272 series;  $w_i$ , the weight of the  $i$ -th  $\alpha$  CCAP neuron; and  $\beta$  the offset. The model's coefficients were estimated using  
273 maximum likelihood estimation (MLE) with the constraint that all weights must be positive.

274 As shown in **Error! Reference source not found.a,b**, the maximum likelihood solution has weights set to zero,  
275 i.e., not all the CCAP neuron time series of every experiment are needed to predict the motoneuronal oscillations.  
276 The minimum number of  $\alpha$  CCAP neurons required to reach the maximum likelihood was 2, the maximum was 6  
277 and the average was around 4. These results should not be interpreted to mean that some  $\alpha$  CCAP neurons do  
278 not have any effect on the motoneuronal oscillatory activity; rather, we expect the redundancy of their activity to  
279 make the likelihood of the model to be maximized with only some of them. The weights were highly variable, also  
280 an indicator of the degeneracy in the system, as  $\alpha$  CCAP neurons with diverse activity dynamics nonetheless  
281 generate similar motoneuronal activity.

282

### 283 **Fig 6: Fit of the logistic model to the experimental data**

284 **(a, b)** Time series of  $\alpha$  CCAP neurons (red, blue), motoneurons (orange, purple), binarized oscillatory activity of  
285 motoneurons (black), and probability of oscillation predicted by the model (green). CCAP activity traces are  
286 shown in red with their corresponding weight value if it is positive (“CCAP ( $W_i > 0$ )”), or in blue with no value if it is  
287 zero (“CCAP ( $W_i = 0$ )”). All weight values were computed through multi-weight model fitting. **(a)** Example of a  
288 good match between the model  $p(t)$  and the oscillatory state of the motoneurons. **(b)** Example of a poor match  
289 during the post-ecdysis phase, as a result of the lack of  $\alpha$  CCAP activity.

290

291 **Error! Reference source not found.a** shows that during the oscillatory activity of motoneurons,  $p(t)$  increased  
292 accordingly; one exception can be observed in **Error! Reference source not found.b**, where the  $p(t)$  barely  
293 increased during rare post-ecdysis oscillatory events, due to the lack of significant increases in the activity of the  $\alpha$   
294 CCAP neurons during this period events (this is the same experiment that showed poor correlation between  
295 CCAP and motoneuron activity).

296 We also fitted a single weight model (same value for all  $w_i$ ), based on the assumption that all  $\alpha$  CCAP neurons  
297 affected motoneuronal activity in the same way. To select the best model by taking into account the tradeoff  
298 between the goodness of fit and the complexity of the model we used the Akaike Information Criterion (AIC) [35].  
299 For all 9 experiments the multi-weight model performed noticeably better (i.e., its values were lower) than did the

300 single-weight model. This suggests that not all CCAP neurons have the same impact on the motoneuronal time  
301 series; the origin of this could be experimental, biological, or a combination of the two.

302

303

|               | Experiments |      |      |      |      |      |      |      |      |
|---------------|-------------|------|------|------|------|------|------|------|------|
|               | 1           | 2    | 3    | 4    | 5    | 6    | 7    | 8    | 9    |
| Single-weight | 908         | 1803 | 1092 | 1519 | 3714 | 2976 | 2312 | 1489 | 3108 |
| Multi-weight  | 711         | 1598 | 888  | 891  | 2481 | 2464 | 2019 | 1227 | 2675 |

304

305 Table 1. Akaike information criterion. AIC values of single- and multi-weight model fittings of every experiment.

306

## 307 [REPRODUCING MOTONEURON CALCIUM ACTIVITY USING A CONDUCTANCE-BASED MODEL](#)

308 A logistic model is an abstract model that can fit a probability function to a binary motoneuron oscillation time  
309 series; however, it is not capable of modeling calcium dynamics. To test if we could reproduce the observed  
310 calcium dynamics, we used a model developed by Jalil et al., 2010, consisting of two endogenously bursting  
311 neurons with fast non-delayed inhibitory connections that synchronize in antiphase. The activity of the neurons  
312 depends on the voltage-dependent potassium and sodium currents and on reciprocally inhibitory synapses  
313 between them. To couple the oscillatory activity of the model to the CCAP neurons, we added a depolarizing  
314 current that depends on the activity of the  $\alpha$  CCAP neurons. The model was further adapted to generate  
315 fluorescence spikes during the phase of motoneuronal oscillation, matching the oscillation timing, the calcium  
316 interspike interval (ISI), the spike phase difference, and the time constant of each experiment (see methods).

317 In our model, 8  $\alpha$  CCAP neurons are coupled to 2 motoneurons (**Error! Reference source not found.**a) and  
318 each  $\alpha$  CCAP neuron releases a peptidergic signal that depolarizes the motoneurons and causes them to  
319 oscillate.  $\alpha$  CCAP neurons release the signal according to the recorded fluorescence time series factored by a

320 weight (already computed in the logistic model). Outputs from the peptidergic neurons are then multiplied by  
321 weights, summed, and transformed with a logistic function to generate the gating variable  $p(t)$ . In this way,  $\alpha$   
322 CCAP neurons modulate the oscillatory behavior of the motoneurons through  $p(t)$ .

323

324 **Fig 7: Simulation of fluorescence spikes.**

325 **(a)** Model circuit structure, showing the 8  $\alpha$  CCAP neurons that release the peptidergic signal (black circles) and  
326 activate the oscillatory behavior of the reciprocally inhibiting motoneurons. **(b)** Simulated fluorescence (top) and  
327 voltage (bottom) time series of left (“Sim L”) and right (“Sim R”) motoneurons. **(c)** Magnification of a small  
328 temporal segment of (b). **(d, e)** Simulation of two different experiments. The gray grid marks probabilities of 0,  
329 0.5 and 1. “MN L”, “MN R”, “Sim L” and “Sim R” indicate experimental left, experimental right, simulated left, and  
330 simulated right motoneurons, respectively.  $p(t)$  indicates the probability of oscillation.

331

332 We fitted the model during multiple passes of manual parameter adjustments and simulation sessions. The  
333 resulting parameter values were identical for all experiments except for  $\tau_f$  and  $\tau_K$ , which were used to fit the  
334 exponential decay and oscillation period, respectively.

335 An example of the bursting behavior of the model is shown **Error! Reference source not found.b**, where  
336 motoneuron fluorescence and voltage are plotted next to each other for comparison and shows that the simulated  
337 fluorescence increases during the bursting phase and decreases during the non-bursting phase. When the model  
338 is run using experimental CCAP time series as its inputs, it can reproduce fairly well the motoneuron oscillatory  
339 behavior (Fig 7d,e). The timing of the simulation oscillations approximately matches that of the experiments, even  
340 during the periods of lower spiking frequency. This is especially interesting considering that  $p(t)$  was fitted to a  
341 binarized (as opposed to a graded) motoneuronal activity signal. Another noteworthy result is that, as more time  
342 passes after an oscillation, the neurons are more likely to begin oscillating again. This effect is the result of the  
343 slow dynamics of the potassium current, which slowly stops inhibiting action potentials (APs); this can be seen in  
344 the last oscillation period in Fig 7d.

345 The simulation spike frequency and its exponential decay matched that of the experiments, as they were fitted  
346 through the  $\tau_{Na}$  and  $\tau_f$  parameters. The noise caused by equation (7) adds amplitude and phase variability,  
347 resembling the one observed in the experiments.

348 Fig 8 compares simulated and experimental motoneuron time series for 3 different experiments in the time and  
349 time-frequency domains. To reduce the noise of the model scaleogram, each simulation was repeated 10 times  
350 and their scaleograms averaged. In all experiments the simulations showed a good time-frequency match to the  
351 experimental data.

352

### 353 **Fig 8: Simulations of the Logistic model linked to a conductance-based bursting model**

354 **(a)** Experimental and a simulation time series of 3 experiments. “MN L”, “MN R”, “Sim L” and “Sim R” indicate the  
355 left and right experimental, and left and right simulated motoneuron activity respectively. **(b)** Corresponding  
356 scaleograms, except that the scaleogram simulations are the average of 10 simulations. Each row shows the  
357 experimental (bottom) and the simulated (top) motoneuron activity, respectively.

358

359 Even though very little is known about the structure of the circuit, our model replicated many of the features of the  
360 activity pattern observed in the experimental recordings, showing that the activity of CCAP neurons is tightly  
361 linked to that of motoneurons.

### 362 **CORRESPONDENCE BETWEEN CALCIUM ACTIVITY AND MOTOR BEHAVIOR**

363 Finally, we wanted to quantify how much the neural activity of the *ex vivo* CNS during fictive ecdysis accurately  
364 reflected the *in vivo* ecdysis motor behavior. To do this, we analyzed the pupal ecdysis motor behavior of intact  
365 animals removed from their puparium. The analytic process is divided into three phases: computation of the  
366 position of midline of the pupa, generation of the time-space diagram, and quantification.

367 To compute the midline of the pupa, a sequence of image processing operations was applied to every frame of  
368 the video. (See Fig 9 Fig 9 and further details in Methods). The result is a time series indicating the position of the  
369 midline of the pupa with respect to the lateral axis, at each position along the antero-posterior axis.

370

### 371 **Fig 9: Midline computation**

372 Sequence of image processing steps used to compute the midline of the pupa for every frame of the video. An  
373 RGB video frame is extracted **(a)** and converted to a grayscale image **(b)**, then thresholded **(c)** and its holes filled  
374 **(d)**. Blob borders are softened by applying a gaussian filter **(e)** and thresholded again **(f)**. Small blobs are  
375 discarded **(g)** and the left (green) and right (red) borders are computed **(h)**. The mean of the two borders  
376 represents the midline (white line).

377

378 The varying position of the midline was used to generate a time-space diagram, where time is mapped in the  
379 horizontal axis and the antero-posterior axis is mapped along the vertical axis. The color code indicates the  
380 position of the midline along the lateral axis. The diagram shows a distinctive pattern for each major motor pattern  
381 (Fig 10a). Peristaltic motor activity begins in the anterior and propagates to the posterior region of the animal,  
382 generating descending line patterns (from top-left to bottom right). The swinging motor pattern is characterized by  
383 a large variation of the midline position in the anteroposterior mid-section and a lengthening and shortening of the  
384 diagram across the anteroposterior axis. The lengthening occurs when the pupa is straight and the shortening  
385 when it bends to the side. Finally, the stretch-compression activity generates variation of the diagram across the  
386 anteroposterior axis like the swinging pattern, but with minimal variation of the midline position in the mid-section.

387

### 388 **Fig 10: Behavioral analysis**

389 **(a)** Time-space diagram patterns generated by three different motor routines. The “AP axis” represents the  
390 anteroposterior axis, which is oriented so that the top of the diagram corresponds to the anterior side of the pupa.  
391 The color indicates the position of the midline in the left-right axis along the anteroposterior axis, with the top and  
392 bottom of the diagrams corresponding to the anterior and posterior sections of the midline, respectively. Darker  
393 colors indicate that the midline section is closer to the left side, whereas lighter colors indicate that it is closer to  
394 the right side. **(b)** Filtered time-space diagrams of 6 pupal recordings aligned to the time when the ecdysis phase  
395 began. White spaces in the top diagram correspond to times when the pupa moved outside the microscope  
396 viewing field. **(c)** Time series of the mid-section of **(b)** (“LR axis” represent the left-right axis).



397

398 We processed using this procedure 6 videos of pupal ecdysis behavior and generated the corresponding time-  
399 space diagrams (Fig 10b) and time series of the mid-sections (Fig 10c). Since pupae were not stimulated with  
400 exogenous ETH at the beginning of the video (as was the case for calcium recordings), we aligned the diagrams  
401 and time series to the beginning of the ecdysis phase.

402 All 6 time-space diagrams showed a similar pattern with very small differences in their timing and period.  
403 Quantifications were done manually by measuring time in the time-space diagram and time series plots (**Error!**  
404 **Reference source not found.**). To measure the period, we measured the duration of the largest time span of full  
405 cycles and divided it by the number of cycles. A swinging cycle was defined as a bending to one side followed by  
406 a bending to the opposite side. During post-ecdysis, a cycle included the bending to both sides followed by the  
407 stretch-compression motor pattern.

408

#### 409 **Fig 11: Behavioral metrics**

410 Metrics and comparison of the motoneuronal activity ( $n = 9$ ) and pupal behavior ( $n = 6$ ). **(a)** Period of the  
411 characteristic motor patterns of each of the ecdysial phases. **(b)** Duration of the ecdysis and of the fast post-  
412 ecdysis phase.

413

414 Finally, we compared the metrics obtained from the behavior of the intact pupal preparations to those of the  
415 motoneuron activity in the *ex vivo* CNS preparations (**Error! Reference source not found.**). The pre-ecdysis  
416 peristaltic contractions period of the pupa averaged  $59.4 \pm 8.7$  s. We were able to visually detect the motoneuron  
417 peristaltic activity in the motoneuronal recordings, but because of the low SNR and time resolution, its  
418 quantification was not reliable.

419 The ecdysis swinging contraction period was significantly shorter in the motoneuronal recordings than in the pupal  
420 recordings ( $25.1 \pm 2.4$  s versus  $45.7 \pm 3.2$  s, respectively;  $p$ -value  $< 0.002$ , two-tailed Mann-Whitney U test). The  
421 mean duration of the ecdysis phase, on the other hand, was not significantly different ( $346.7 \pm 37.8$  s versus  
422  $363.2 \pm 31.2$  s, respectively).

423 The mean post-ecdysis cycle period was  $128.8 \pm 37$  s in the motoneuronal recordings. In intact animals, in  
424 contrast, we noticed that the post-ecdysis phase could be divided into two subphases: a fast one followed by a  
425 slow one. Both subphases included alternations between periods of swinging and periods of stretch-compression  
426 contractions, but in the slower phase the stretch-compressions tended to be of longer duration. The mean period  
427 was  $76.4 \pm 2.4$  s for the fast and  $187.3 \pm 9.6$  s for the slow subphases, respectively. We compared the mean of  
428 the three groups and found significant differences only between the slow and fast post-ecdysial phases (p-value <  
429 0.004, two-tailed Mann-Whitney U test). The mean duration of the fast post-ecdysis phase was  $724.1 \pm 22.1$  s.  
430 The slow post-ecdysis phase duration could not be measured as it persisted past the end of the recording time.

431 In summary, we found that most of the activity recorded during pupal ecdysis behavior in intact animals had a  
432 fictive counterpart, but the *ex vivo* motoneuronal recordings showed different timing and greater irregularity. This  
433 indicates that the neural circuit controlling ecdysis behaves differently when tested in isolation, suggesting that  
434 sensory feedback could play an important role in regulating the timing of the ecdysis sequence.

## 435 Discussion

436 Ecdysis behavior consists of 3 separate motor programs (pre-ecdysis, ecdysis and post-ecdysis) that are  
437 expressed in a specific temporal order. A successful ecdysis is the result of the interplay between peptidergic  
438 neurons and motoneurons, each with quite different temporal patterns of activation. Here, we have combined  
439 calcium imaging recordings, computational tools, and behavioral analyses to gain better insights into the  
440 functional relationships between these two neuronal populations.

441 Our results suggest that CCAP neurons trigger motoneuronal activity and also sustain it throughout the ecdysis  
442 and post-ecdysis subroutines. Moreover, our analyses reveal a cross-frequency interaction between these two  
443 neuronal populations, as the slow variations in CCAP activity is correlated with the faster oscillations of  
444 motoneurons. This raises the question: What is the advantage of having CCAP neurons continuously modulating  
445 motoneuronal outputs? One possible answer is that it provides a continuous control over the desired behavior,  
446 allowing feedback mechanisms or environmental conditions to modify it. Our analyses show that the activity  
447 patterns of CCAP neurons correlate with different motor outputs: high CCAP activity generates swinging  
448 contractions over the ecdysis phase, whereas the alternation between high and low amplitude CCAP responses

449 signals the transition from swinging contractions to stretch-compression movement, which are distinctive of post-  
450 ecdysis. Thus, specific CCAP activity patterns could be triggering the release of neuropeptides and potentially  
451 neurotransmitters in an activity-dependent way to modulate diverse motor outputs. It has been reported that co-  
452 transmitters have distinct activity thresholds for their release, providing opportunities for circuit flexibility. For  
453 example, a low, tonic firing frequency may result in the release of neurotransmitters, whereas rhythmic bursting  
454 pattern may cause the release of both neurotransmitters and neuropeptides [37]. Consequently, a firing rate-  
455 dependent response would generate the modulation of diverse post-synaptic outputs [38–40]. To confirm that the  
456 CCAP activity pattern is modulating the release of neuropeptides or neurotransmitters in an activity-dependent  
457 way throughout ecdysis, an *in vivo* characterization of neuropeptide-neurotransmitter release associated to  
458 specific activity patterns and behavioral phases would have to be undertaken.

459 We showed that the activity of CCAP neurons can be aligned with motoneuron oscillatory activity using both an  
460 abstract logistic model and a conductance-based model. Using these models, CCAP activity could accurately  
461 predict motoneuronal oscillatory activity (error rate <10%). In addition, the models showed that in general only 4  
462 CCAP neurons or fewer (of a total of 8), were required to predict the start of an oscillatory episode. A possible  
463 explanation for this result is related to redundancy within the CCAP ensemble. In *Drosophila*, the CCAP AN1-AN4  
464 network consists of 16 neurons that have been largely characterized from a molecular to a functional point of view  
465 [22,23,25,27]. The functional redundancy predicted by our model can have two interpretations. On one hand, it is  
466 possible that only one half of the CCAP AN1-AN4 cells may be necessary and sufficient to trigger ecdysis and  
467 post-ecdysis phases, with the rest of the network adding robustness and flexibility to the control of motoneuronal  
468 oscillations. Alternatively, all CCAP AN1-AN4 neurons may be necessary for the oscillatory command to reach the  
469 entire motoneuronal population. In this case, the statistical redundancy emerges just because of their coordination  
470 and synchronization. These two scenarios could be distinguished experimentally, through the selective  
471 inactivation of one or more CCAP neurons using recently developed holographic optogenetic tools [41–43].

472 With the addition of a simple conductance-based bursting CPG model [36,44], we were able to replicate the  
473 motoneuronal oscillatory activity. In the absence of any electrophysiological information about the neurons that  
474 generate this rhythm and the ion channels involved, we chose a simple generic neuronal oscillator. However, the  
475 well-known degeneracy and diversity found in oscillation-generating circuits [45–47] implies that many different

476 neuronal models could produce the same output. It also implies that it is virtually impossible to make a better  
477 prediction without further electrophysiological evidence, and moreover, that the details of mechanisms found in  
478 different species can diverge significantly. Our analysis methods provide a framework to interpret new  
479 experimental manipulations that can be made to the mechanisms downstream the CCAP command signal.

480 The 3 different motor programs of ecdysis can be observed in puparium-free preparations. Until now, these  
481 components have been qualitatively characterized only on the bases of obvious motor changes [22,25]. Our  
482 computational method allowed us to quantitatively characterize the ecdysis and post-ecdysis behavioral programs  
483 and to contrast them with the associated motoneuronal activity. These analyses showed that most of the activity  
484 observed during pupal behavior had its fictive counterpart in the *ex-vivo* preparation. However, the patterns of  
485 motoneuronal activity were more variable compared to the behavior observed in the intact animal. This mismatch  
486 could be caused by sensory feedback, which has been shown to be critical for the proper organization of motor  
487 programs in many animals [33,48,49]. Sensory information may impact CCAP network activity itself or,  
488 alternatively, that of downstream CCAP targets. One possible source for this sensory (proprioceptive) feedback  
489 are somatosensory neurons located along the body wall of the pupa. In this regard, computational modeling of the  
490 neural circuits involved in the production of peristaltic waves during larvae crawling, have showed that adding  
491 sensory feedback to a CPG network model affects both speed and intersegmental phase relationships [50].  
492 Moreover, recent experimental work supports the idea that proprioceptive feedback plays a key role on the proper  
493 coordination of muscle contraction and on the speed of wave propagation [51]. Additional work must be done in  
494 order to identify the potential proprioceptive pathway that modulates the ecdysis motor sequence.

495 Finally, our algorithm also detected that post-ecdysis phase can be divided into fast and slow contraction  
496 frequencies. This newly detected motor program seems to be absent from our  $\text{Ca}^{+2}$  imaging recordings,  
497 suggesting that additional network layers between CCAP and motoneurons may potentially be involved, whose  
498 activity pattern has not yet been detected or characterized. Using our computational tools, future experimental  
499 research will be able to quantitatively relate this second post-ecdysis phase to the activity of other neural  
500 populations or gene expression networks.

501

## 502 METHODS

### 503 Fly lines

504 *Drosophila melanogaster* cultures were raised on standard agar/cornmeal/yeast media and housed at 22-25°C.  
505 The following GAL4 drivers were used: *Ccap*-GAL4 (driver for CCAP neurons; [52]) and C164-GAL4 (driver for  
506 motoneurons; [53]). We obtained the genetically encoded calcium sensitive, GCaMP3.2, from Julie Simpson  
507 (Janelia Farm, USA). GCaMP3.2 was expressed in CCAP neurons and motoneurons simultaneously by  
508 combining the *Ccap*-GAL4 and C164-GAL4 drivers using standard techniques.

509

### 510 Imaging of calcium dynamics

511 Calcium ( $\text{Ca}^{2+}$ ) recordings were carried out essentially as described in Mena *et al.* [25]. Briefly, animals containing  
512 a bubble in the mid-region of the puparium (~4 hours before pupal ecdysis) were selected. The central nervous  
513 system (CNS) was dissected in cold PBS, immobilized in 1.5% low melting temperature agarose solution (Sigma  
514 type VII-A; Sigma-Aldrich Chemical Co., MO) and covered with Schneider's Insect Medium (Sigma-Aldrich  
515 Chemical Co., MO). Recordings were performed using an Olympus DSU Spinning Disc microscope (Olympus  
516 Corporation, Shinjuku-ku, Tokyo, Japan) under a 20 X W NA 0.50 immersion lens. GFP signal was acquired using  
517 an ORCA IR2 Hamamatsu camera (Hamamatsu Photonics, Higashi-ku, Hamamatsu City, Japan) using the CellR  
518 Olympus Imaging Software (Olympus Soft Imaging Solutions, Munich, Germany). Fictive ecdysis was triggered by  
519 adding 600 nM of ETH1 (Bachem Co., USA). We recorded multiplane fluorescence using a sampling rate of 1  
520 picture every 2-3 second for at least 60 min. Depending on the preparation, the number of images per z-stack  
521 was 3-5 focal planes (covering 100-200  $\mu\text{m}$  in depth), which allowed the entire motoneuronal and CCAP network  
522 to be imaged.

523

## 524 Video pre-processing

525 Video sequences were first processed using ImageJ [54]. Calcium time series were first detrended in order to  
526 compensate for slow variations of fluorescence during the recording caused by tissue drifting, then normalized in  
527 order to make the time series more uniform in terms of the minima and maxima of fluorescence. Detrending was  
528 performed by finding the minimum values during the first and the last 250 s of the time series, generating a line  
529 that crossed those points, and subtracting the corresponding value from each frame. The normalization linearly  
530 mapped the time series so that the minimum and maximum values were 0 and 1, respectively.

531

$$534 \quad m = \frac{f(t_1) - f(t_0)}{t_1 - t_0}$$

532

$$535 \quad g(t) = f(t) - mt$$

533

$$536 \quad h(t) = \frac{g(t) - f_{\min}}{f_{\max} - f_{\min}}$$

537 Where  $f(t)$ ,  $g(t)$ ,  $h(t)$  are the unprocessed, the detrended, and the preprocessed signals, respectively.  $t_0$ ,  $t_1$  are  
538 the time of the minimum value within the first and last 250 s of the signal, respectively, and  $m$  the slope of the  
539 detrending line.  $f_{\min}$  and  $f_{\max}$  are the minimum and maximum value of the detrended signal, respectively.

540 We focused most of our analyses on the GCaMP activity of individual CCAP neurons of the  $\alpha$  class [25], whereas  
541 for the motoneurons we analyzed the total GCaMP activity on the left and right sides of the abdominal CNS, due  
542 to their large number. In preparations in which both CCAP and motoneurons expressed GCaMP, the 2 sets of  
543 neurons were readily distinguishable by their position and size.

## 544 Activity onset

545 The computation of activity onset was performed using a smoothed version of the time series, obtained by  
546 convolving the original time series with a rectangular window function of 10 s duration and area of 1. Onset was

547 defined as the first instant for which the convolved time series exceeded 1/2 of the maximum amplitude of the  
548 original time series. The first 100 s of the time series were discarded because some neurons displayed a high  
549 level of fluorescence at the beginning of the recordings.

## 550 Time frequency analyses

551 Time-frequency analyses were performed using the continuous wavelet transform (CWT) [55] with the complex  
552 Morlet wavelet ( $\sigma = 3$ ). The CWT is defined by:

$$553 \quad W(t, s) = \frac{1}{s} \int_{-\infty}^{\infty} f(u) \overline{\Psi\left(\frac{u-t}{s}\right)} du$$

554

555 Where  $s$  is the scale parameter,  $t$  the position parameter,  $f()$  the signal function,  $\Psi()$  the wavelet function and the  
556 overline represents the complex conjugate.

557 The complex Morlet is defined as:

$$558 \quad \Psi_{\sigma}(t) = \left(1 + \exp(-\sigma^2) - 2 \exp\left(-\frac{3}{4}\sigma^2\right)\right)^{-\frac{1}{2}} \pi^{-\frac{1}{4}} \exp\left(-\frac{1}{2}t^2\right) \left(\exp(i\sigma t) - \exp\left(-\frac{1}{2}\sigma^2\right)\right)$$

559 Which has a central frequency  $\sim\sigma$  or central period  $\sim 1/\sigma$ .

560 The scaleogram, analog to the spectrogram, is defined as the square of the amplitude of the CWT:

$$561 \quad X(t, s) = W(t, s) \overline{W(t, s)}$$

562 The scale is related to the period ( $T$ ) in the following relationship:

$$563 \quad T = \sim s/\sigma$$

## 564 Conductance based model

565 We adapted a CPG model developed by Jalil et al. (2010) by adding the  $I_{i,CCAP}$  and  $I_{i,X}$  terms, which represent  
566 currents generated by input from CCAP neurons and stochasticity, respectively; and by adding an equation that  
567 models the calcium fluorescence induced by neuronal activity.

$$\frac{dV_i}{dt}(t) = -\frac{I_{i,Na} + I_{i,K} + I_{i,L} + I_{i,Syn} + I_{i,CCAP}(t) + I_{i,X}}{C} \quad (1)$$

$$I_{i,Na} = g_{Na}(V_i - E_{Na})n_i^3 h_i \quad (2)$$

$$I_{i,K} = g_K(V_i - E_K)m_i^2 \quad (3)$$

$$I_{i,L} = g_L(V_i - E_L) \quad (4)$$

$$I_{i,Syn} = g_{Syn}(V_i - E_{Syn})s(-1000(V_j + 0.0225)), \quad i \neq j \quad (5)$$

$$I_{i,CCAP}(t) = g_{CCAP}(V_i - E_{CCAP})p(t) \quad (6)$$

$$dI_{i,X} = -\frac{I_{i,X}}{\tau_X} + \sigma_X W_{i,t} \quad (7)$$

$$n_i = s(-150(V_i + 0.0305)) \quad (8)$$

$$\frac{dh_i}{dt} = \frac{s(500(V_i + 0.0333)) - h_i}{\tau_{Na}} \quad (9)$$

$$\frac{dm_i}{dt} = \frac{s(-83(V_i + V_{Shift})) - m_i}{\tau_K} \quad (10)$$

$$\frac{df_i}{dt} = \frac{s(-100(V_i + 0.04)) - f_i}{\tau_f} \quad (11)$$

$$s(x) = \frac{1}{1 + \exp(x)} \quad (12)$$

568

569 In this model,  $V$  is the membrane voltage,  $C$ , the membrane capacitance, and  $t$ , the time.  $I$ ,  $g$ ,  $E$ ,  $\tau$ , represent,  
 570 respectively, the current, the maximum conductance, the reversal potential, and the time constant. The subscripts  
 571  $i, j$  refer to neuron index, Na, K, L, Syn, CCAP, X refer to sodium, potassium, leakage, synapse, CCAP, and noise  
 572 (which is an Ornstein-Uhlenbeck process), respectively.  $p(t)$  is the motoneuronal oscillation probability.  $W_t$   
 573 represents a Wiener process and  $\sigma_x$  its volatility.  $n$ ,  $h$ ,  $m$  are the sodium activating, sodium inactivating, and  
 574 potassium activating gating variables, respectively;  $f$  represents the calcium imaging fluorescent intensity.  $V_{Shift}$  is  
 575 a potassium activation curve shifting parameter.

576 Equation 6 was added to generate a depolarizing current during the predicted oscillatory phase.  $p(t)$ , the  
 577 oscillating probability at time  $t$  from the logistic model, approaches 0 when the oscillation probability is low and 1



578 when it is high. In the conductance model,  $p(t)$  acts as a gating variable,  $g_{CCAP}$  is the maximum conductance  
579 parameter and  $E_{CCAP}$  is the reversal potential. A high  $p(t)$  value generates depolarizing currents that help the  
580 system reach the voltage threshold to fire action potentials (APs) in a bursting and alternating pattern between the  
581 neurons of the circuit. By contrast, a low  $p(t)$  value tends to keep the system in a non-oscillatory state.

582 Equation 7 adds stochasticity to the model, which has the effect of mimicking the probabilistic influence of the  $\alpha$   
583 CCAP neurons on the motoneuronal oscillatory activity. It also adds phase noise during the oscillatory activity,  
584 similar to the one observed in the experimental recordings (Fig 4).

585 Equation 11 generates fluorescence (calcium) spikes, which respond with a time constant  $\tau_f$ . The equation  
586 produces increases in the values of fluorescence during the bursting phase and decreases during the non-  
587 bursting phase.

588 Simulations were done using the following parameters:  $C=0.5$  nF;  $\tau_{Na}=0.055$  s;  $g_{Na}=200$  nS;  $g_K=45$  nS;  $g_L=10$   
589 nS;  $g_{Syn}=0.5$  nS;  $g_{CCAP}=1$  nS;  $E_{Na}=0.045$  V;  $E_K=-0.07$  V;  $E_L=-0.046$  V;  $E_{Syn}=-0.0625$  V;  $E_{CCAP}=0$  V;  $V_{Shift}=0.022$  V;  
590  $\tau_x=0.001$  s;  $\sigma_x=0.03$  nA.

591 The values for  $\tau_K$  and  $\tau_f$  varied as they were adjusted to each individual experiment. Their values are given in  
592 Table 2

| Parameter    | Experiment |      |       |      |       |      |      |      |      |
|--------------|------------|------|-------|------|-------|------|------|------|------|
|              | 1          | 2    | 3     | 4    | 5     | 6    | 7    | 8    | 9    |
| $\tau_K$ (s) | 55.2       | 63.9 | 125.6 | 67.7 | 136.5 | 71.5 | 71.5 | 69.0 | 88.1 |
| $\tau_f$ (s) | 3.2        | 4.1  | 11.2  | 10.0 | 11.2  | 4.8  | 8.6  | 3.7  | 4.4  |

593

594 **Table 2.** Values of  $\tau_K$  and  $\tau_f$  used for the fit of each experiments.

595

596 The oscillation period of the calcium spikes is affected by many parameters, but  $\tau_K$  affects it linearly and does not  
597 affect the duty cycle and phase difference, making it much easier to adjust manually. The exponential decay on  
598 the other hand can only be fitted through  $\tau_f$  and does not affect the model dynamics.

## 599 Time constants

600 The time constant for the fluorescence signal was computed by fitting an exponential decay function to the data,  
601 defined by:

$$602 \quad f(t) = a \exp\left(\frac{-t}{\tau}\right) + b$$

603 Where  $a$ ,  $b$  and  $\tau$  are constants,  $a$  represents the amplitude of the decay,  $b$  the basal fluorescence, and  $\tau$  the time  
604 constant. The time constant of a segment was defined to be the  $\tau$  of the fitted 15 s template, which was adjusted  
605 through the least squares method.

606 The average time constant ( $\tau_i$ ) of the exponential decay of motoneuron calcium spikes was computed using only  
607 high quality (high SNR) segments of the recordings.

608 The time constant of the potassium gating variable ( $\tau_K$ ) was adjusted manually to make the periodicity of  
609 oscillations of the model match the previously measured periodicity of motoneuronal oscillation.

## 610 Puparium-free behavioral recordings and processing

611 Behavioral recordings were carried out as described in [25] Mena et al., 2016. Briefly, the pupa was surgically  
612 removed from the puparium at the very start of pre-ecdysis and placed in a recording chamber with halocarbon oil  
613 (Sigma-Aldrich Chemical Co., MO). The animals were filmed under transmitted light using a Leica DMLB  
614 microscope (20 X magnification) for at least 60 min.

615 Color RGB frames were extracted from the video sequence in real number format, with 0 and 1 representing the  
616 minimum and maximum intensity, respectively (Fig 9a). The images were converted to grayscale by averaging the  
617 intensity of the three-color component channels (Fig 9b). Pixels of the images were thresholded by setting them to  
618 0 if the grayscale values were lower than 0.1 or to 1.0 otherwise (Fig 9c). Holes, or black regions inside white  
619 regions were then filled (Fig 9d). Although the value of the threshold was chosen arbitrarily, we found that the  
620 resulting thresholded image was not very sensitive to its exact value. To extract the main behavioral features,  
621 high spatial frequency details were removed in a two-step process. The images were first convolved with a  
622 gaussian function with  $\sigma = 3$  pixels (Fig 9e) and then thresholded at a threshold of 0.5, to avoid expanding  
623 (dilating) or reducing (eroding) the borders of the pupa (Fig 9f). Regions with less than 10000 white pixels, roughly

624 20% of the area of the pupa (see Fig 9g) were discarded. The left- and rightmost pixels of the pupa along the  
625 anteroposterior axis were then computed. The average between the left- and rightmost pixels along the axis were  
626 considered to represent the midline of the pupa (Fig 9h).

627

## 628 REFERENCES

629

- 630 1. Lisman JE, Idiart MA. Storage of 7 +/- 2 short-term memories in oscillatory subcycles. *Science*. 1995;267:  
631 1512–5. doi:10.1126/science.7878473
- 632 2. Clapp WC, Rubens MT, Sabharwal J, Gazzaley A. Deficit in switching between functional brain networks  
633 underlies the impact of multitasking on working memory in older adults. *Proc Natl Acad Sci*. 2011;108:  
634 7212–7217. doi:10.1073/pnas.1015297108
- 635 3. Gray CM. Synchronous oscillations in neuronal systems: mechanisms and functions. *J Comput Neurosci*.  
636 1994;1: 11–38. doi:10.1007/BF00962716
- 637 4. Laurent G, Davidowitz H. Encoding of olfactory information with oscillating neural assemblies. *Science*.  
638 1994;265: 1872–5. doi:10.1126/science.265.5180.1872
- 639 5. Laurent G, Naraghi M. Odorant-induced oscillations in the mushroom bodies of the locust. *J Neurosci*.  
640 1994;14: 2993–3004. Available: <http://www.ncbi.nlm.nih.gov/pubmed/8182454>
- 641 6. Wehr M, Laurent G. Odour encoding by temporal sequences of firing in oscillating neural assemblies.  
642 *Nature*. 1996;384: 162–6. doi:10.1038/384162a0
- 643 7. Ramirez J-M, Tryba AK, Peña F. Pacemaker neurons and neuronal networks: an integrative view. *Curr*  
644 *Opin Neurobiol*. 2004;14: 665–74. doi:10.1016/j.conb.2004.10.011
- 645 8. Grillner S. Biological pattern generation: the cellular and computational logic of networks in motion.  
646 *Neuron*. 2006;52: 751–66. doi:10.1016/j.neuron.2006.11.008

- 647 9. Dickinson PS. Neuromodulation of central pattern generators in invertebrates and vertebrates. *Curr Opin*  
648 *Neurobiol.* 2006;16: 604–614. doi:10.1016/j.conb.2006.10.007
- 649 10. Garcia-Campmany L, Stam FJ, Goulding M. From circuits to behaviour: motor networks in vertebrates.  
650 *Curr Opin Neurobiol.* 2010;20: 116–125. doi:10.1016/j.conb.2010.01.002
- 651 11. Dubowy CM, Cavanaugh DJ. Sleep: a neuropeptidergic wake-up call for flies. *Curr Biol.* 2014;24: R1092-4.  
652 doi:10.1016/j.cub.2014.10.020
- 653 12. Bargmann CI, Marder E. From the connectome to brain function. *Nat Methods.* 2013;10: 483–90.  
654 doi:10.1038/nmeth.2451
- 655 13. Selverston AI. Invertebrate central pattern generator circuits. *Philos Trans R Soc Lond B Biol Sci.*  
656 2010;365: 2329–45. doi:10.1098/rstb.2009.0270
- 657 14. Zhao Y, Bretz CA, Hawksworth SA, Hirsh J, Johnson EC. Corazonin neurons function in sexually  
658 dimorphic circuitry that shape behavioral responses to stress in *Drosophila*. *PLoS One.* 2010;5: e9141.  
659 doi:10.1371/journal.pone.0009141
- 660 15. Yapici N, Kim Y-J, Ribeiro C, Dickson BJ. A receptor that mediates the post-mating switch in *Drosophila*  
661 reproductive behaviour. *Nature.* 2008;451: 33–7. doi:10.1038/nature06483
- 662 16. Feany MB, Quinn WG. A neuropeptide gene defined by the *Drosophila* memory mutant *amnesiac*.  
663 *Science.* 1995;268: 869–73. doi:10.1126/science.7754370
- 664 17. Reynolds SE. Integration of Behaviour and Physiology in Ecdysis. *Adv Insect Phys.* 1980;15: 475–595.  
665 doi:10.1016/S0065-2806(08)60144-7
- 666 18. Ewer J, Reynolds S. Neuropeptide Control of Molting in Insects. *Hormones, Brain and Behavior.* Academic  
667 Press; 2002. pp. 1–XVI. doi:10.1016/B978-012532104-4/50037-8
- 668 19. Mesce KA, Fahrbach SE. Integration of endocrine signals that regulate insect ecdysis. *Front*  
669 *Neuroendocrinol.* 2002;23: 179–99. doi:10.1006/frne.2002.0228
- 670 20. Zitnan D, Adams ME. 3.1 - Neuroendocrine Regulation of Insect Ecdysis. In: Gilbert LIBT-CMIS, editor.

- 671 Comprehensive Molecular Insect Science. Amsterdam: Elsevier; 2005. pp. 1–60.  
672 doi:<https://doi.org/10.1016/B0-44-451924-6/00032-6>
- 673 21. Gammie SC, Truman JW. Neuropeptide hierarchies and the activation of sequential motor behaviors in the  
674 hawkmoth, *Manduca sexta*. *J Neurosci*. 1997;17: 4389–4397. Available:  
675 [papers3://publication/uuid/B3A812E0-B612-47EF-B786-292174EE5657](https://pubmed.ncbi.nlm.nih.gov/9411111/)
- 676 22. Kim Y-J, Zitnan D, Galizia CG, Cho K-H, Adams ME. A command chemical triggers an innate behavior by  
677 sequential activation of multiple peptidergic ensembles. *Curr Biol*. 2006;16: 1395–1407.  
678 doi:[10.1016/j.cub.2006.06.027](https://doi.org/10.1016/j.cub.2006.06.027)
- 679 23. Lahr EC, Dean D, Ewer J. Genetic analysis of ecdysis behavior in *Drosophila* reveals partially overlapping  
680 functions of two unrelated neuropeptides. *J Neurosci*. 2012;32: 6819–6829.  
681 doi:[10.1523/JNEUROSCI.5301-11.2012](https://doi.org/10.1523/JNEUROSCI.5301-11.2012)
- 682 24. Kim D-H, Han M-R, Lee G, Lee SS, Kim Y-J, Adams ME. Rescheduling Behavioral Subunits of a Fixed  
683 Action Pattern by Genetic Manipulation of Peptidergic Signaling. Schoofs L, editor. *PLOS Genet*. 2015;11.  
684 doi:[10.1371/journal.pgen.1005513](https://doi.org/10.1371/journal.pgen.1005513)
- 685 25. Mena W, Diegelmann S, Wegener C, Ewer J. Stereotyped responses of *Drosophila* peptidergic neuronal  
686 ensemble depend on downstream neuromodulators. *Elife*. 2016;5: 22. doi:[10.7554/eLife.19686](https://doi.org/10.7554/eLife.19686)
- 687 26. Diao F, Mena W, Shi J, Park D, Diao F, Taghert P, et al. The splice isoforms of the *Drosophila* ecdysis  
688 triggering hormone receptor have developmentally distinct roles. *Genetics*. 2016;202: 175–189.  
689 doi:[10.1534/genetics.115.182121](https://doi.org/10.1534/genetics.115.182121)
- 690 27. Diao F, Elliott AD, Diao F, Shah S, White BH. Neuromodulatory connectivity defines the structure of a  
691 behavioral neural network. *Elife*. 2017;6: 1–30. doi:[10.7554/eLife.29797](https://doi.org/10.7554/eLife.29797)
- 692 28. Lemon WC, Pulver SR, Höckendorf B, McDole K, Branson K, Freeman J, et al. Whole-central nervous  
693 system functional imaging in larval *Drosophila*. *Nat Commun*. 2015;6: 7924. doi:[10.1038/ncomms8924](https://doi.org/10.1038/ncomms8924)
- 694 29. Kato S, Kaplan HS, Schrödel T, Skora S, Lindsay TH, Yemini E, et al. Global brain dynamics embed the  
695 motor command sequence of *Caenorhabditis elegans*. *Cell*. 2015;163: 656–69.

- 696 doi:10.1016/j.cell.2015.09.034
- 697 30. Freeman J, Vladimirov N, Kawashima T, Mu Y, Sofroniew NJ, Bennett D V, et al. Mapping brain activity at  
698 scale with cluster computing. *Nat Methods*. 2014;11: 941–50. doi:10.1038/nmeth.3041
- 699 31. Loveall BJ, Deitcher DL. The essential role of bursicon during drosophila development. *BMC Dev Biol*.  
700 2010;10. doi:10.1186/1471-213X-10-92
- 701 32. Karsai G, Pollák E, Wacker M, Vömel M, Selcho M, Berta G, et al. Diverse in- and output polarities and  
702 high complexity of local synaptic and non-synaptic signaling within a chemically defined class of  
703 peptidergic *Drosophila* neurons. *Front Neural Circuits*. 2013;7: 1–22. doi:10.3389/fncir.2013.00127
- 704 33. Hughes CL, Thomas JB. A sensory feedback circuit coordinates muscle activity in *Drosophila*. *Mol Cell*  
705 *Neurosci*. 2007;35: 383–396. doi:10.1016/j.mcn.2007.04.001
- 706 34. Sporns O. Terzahi\_1956\_Conference\_Submarine Landslides.pdf. 2013; 247–262.
- 707 35. Akaike H. A new look at the statistical model identification. *IEEE Trans Automat Contr*. 1974;19: 716–723.  
708 doi:10.1109/TAC.1974.1100705
- 709 36. Jalil S, Belykh I, Shilnikov A. Fast reciprocal inhibition can synchronize bursting neurons. *Phys Rev E -*  
710 *Stat Nonlinear, Soft Matter Phys*. 2010;81: 1–4. doi:10.1103/PhysRevE.81.045201
- 711 37. Nässel DR. Neuropeptide signaling near and far: how localized and timed is the action of neuropeptides in  
712 brain circuits? *Invert Neurosci*. 2009;9: 57–75. doi:10.1007/s10158-009-0090-1
- 713 38. Ludwig M, Leng G. Dendritic peptide release and peptide-dependent behaviours. *Nat Rev Neurosci*.  
714 2006;7: 126–136. doi:10.1038/nrn1845
- 715 39. Nusbaum MP, Blitz DM, Marder E. Functional consequences of neuropeptide and small-molecule co-  
716 transmission. *Nat Rev Neurosci*. 2017;18: 389–403. doi:10.1038/nrn.2017.56
- 717 40. Nässel DR. Substrates for Neuronal Cotransmission With Neuropeptides and Small Molecule  
718 Neurotransmitters in *Drosophila*. *Front Cell Neurosci*. 2018;12. doi:10.3389/fncel.2018.00083
- 719 41. Szabo V, Ventalon C, De Sars V, Bradley J, Emiliani V. Spatially selective holographic photoactivation and

- 720 functional fluorescence imaging in freely behaving mice with a fiberscope. *Neuron*. 2014;84: 1157–69.  
721 doi:10.1016/j.neuron.2014.11.005
- 722 42. Hernandez O, Papagiakoumou E, Tanese D, Fidelin K, Wyart C, Emiliani V. Three-dimensional  
723 spatiotemporal focusing of holographic patterns. *Nat Commun*. 2016;7. doi:10.1038/ncomms11928
- 724 43. Shemesh OA, Tanese D, Zampini V, Linghu C, Piatkevich K, Ronzitti E, et al. Temporally precise single-  
725 cell-resolution optogenetics. *Nat Neurosci*. 2017;20: 1796–1806. doi:10.1038/s41593-017-0018-8
- 726 44. Shilnikov A, Cymbalyuk G. Transition between tonic spiking and bursting in a neuron model via the blue-  
727 sky catastrophe. *Phys Rev Lett*. 2005;94: 48101. doi:10.1103/PhysRevLett.94.048101
- 728 45. Marder E, Taylor AL. Multiple models to capture the variability in biological neurons and networks. *Nat*  
729 *Neurosci*. 2011;14: 133–138. doi:10.1038/nn.2735
- 730 46. Marder E. Variability, compensation, and modulation in neurons and circuits. *Proc Natl Acad Sci U S A*.  
731 2011;108 Suppl: 15542–15548. doi:10.1073/pnas.1010674108
- 732 47. Gjorgjieva J, Drion G, Marder E. Computational implications of biophysical diversity and multiple  
733 timescales in neurons and synapses for circuit performance. *Curr Opin Neurobiol*. 2016;37: 44–52.  
734 doi:10.1016/j.conb.2015.12.008
- 735 48. Büschges A, Akay T, Gabriel JP, Schmidt J. Organizing network action for locomotion: Insights from  
736 studying insect walking. *Brain Res Rev*. 2008;57: 162–171. doi:10.1016/j.brainresrev.2007.06.028
- 737 49. Ayali A, Couzin-Fuchs E, David I, Gal O, Holmes P, Knebel D. Sensory feedback in cockroach locomotion:  
738 current knowledge and open questions. *J Comp Physiol A Neuroethol Sensory, Neural, Behav Physiol*.  
739 2015;201: 841–850. doi:10.1007/s00359-014-0968-1
- 740 50. Gjorgjieva J, Berni J, Evers JF, Eglén SJ. Neural circuits for peristaltic wave propagation in crawling  
741 *Drosophila* larvae: analysis and modeling. *Front Comput Neurosci*. 2013;7: 1–19.  
742 doi:10.3389/fncom.2013.00024
- 743 51. Fushiki A, Zwart MF, Kohsaka H, Fetter RD, Cardona A, Nose A. A circuit mechanism for the propagation  
744 of waves of muscle contraction in *Drosophila*. *Elife*. 2016;5: 1–23. doi:10.7554/eLife.13253

- 745 52. Park JH, Schroeder AJ, Helfrich-Förster C, Jackson FR, Ewer J. Targeted ablation of CCAP neuropeptide-  
746 containing neurons of *Drosophila* causes specific defects in execution and circadian timing of ecdysis  
747 behavior. *Development*. 2003;130: 2645–2656. doi:10.1242/dev.00503
- 748 53. Torroja L, Packard M, Gorczyca M, White K, Budnik V. The *Drosophila* beta-amyloid precursor protein  
749 homolog promotes synapse differentiation at the neuromuscular junction. *J Neurosci*. 1999;19: 7793–  
750 7803. Available: <http://www.ncbi.nlm.nih.gov/pubmed/10479682>
- 751 54. Schneider CA, Rasband WS, Eliceiri KW. NIH Image to ImageJ: 25 years of image analysis. *Nat Methods*.  
752 2012;9: 671–675. doi:10.1038/nmeth.2089
- 753 55. Bertrand O, Tallon-Baudry C, Pernier J. Time-Frequency Analysis of Oscillatory Gamma-Band Activity:  
754 Wavelet Approach and Phase-Locking Estimation. *Biomag* 96. New York, NY: Springer New York; 2000.  
755 pp. 919–922. doi:10.1007/978-1-4612-1260-7\_224
- 756



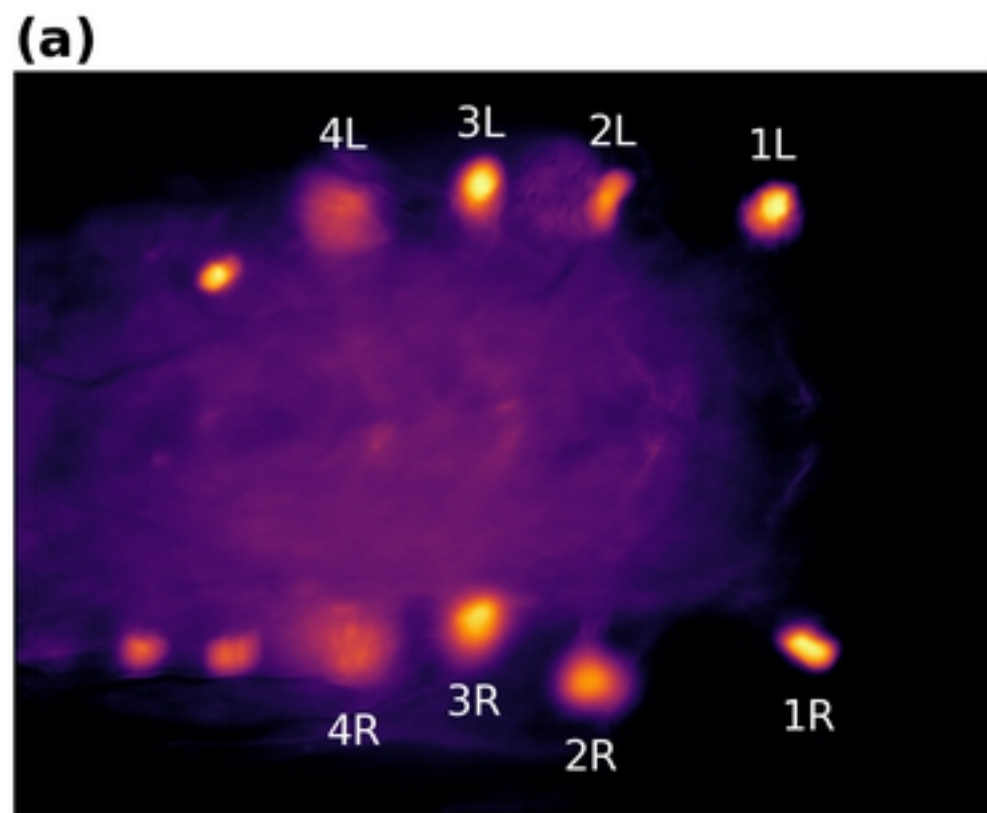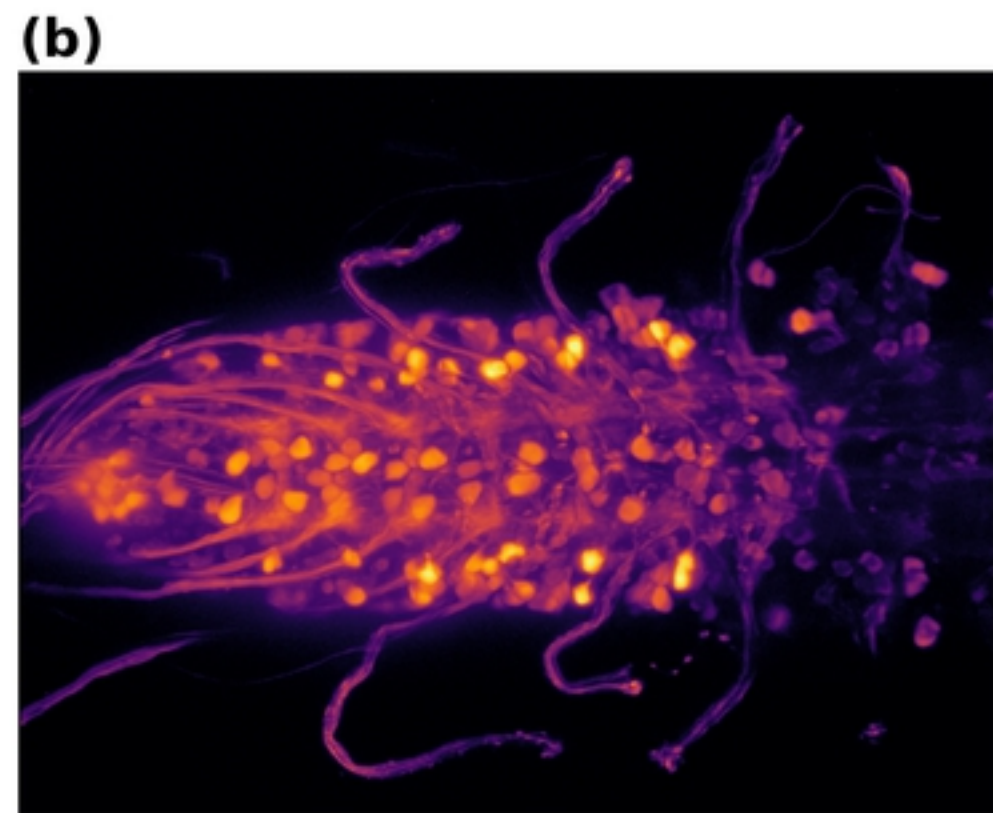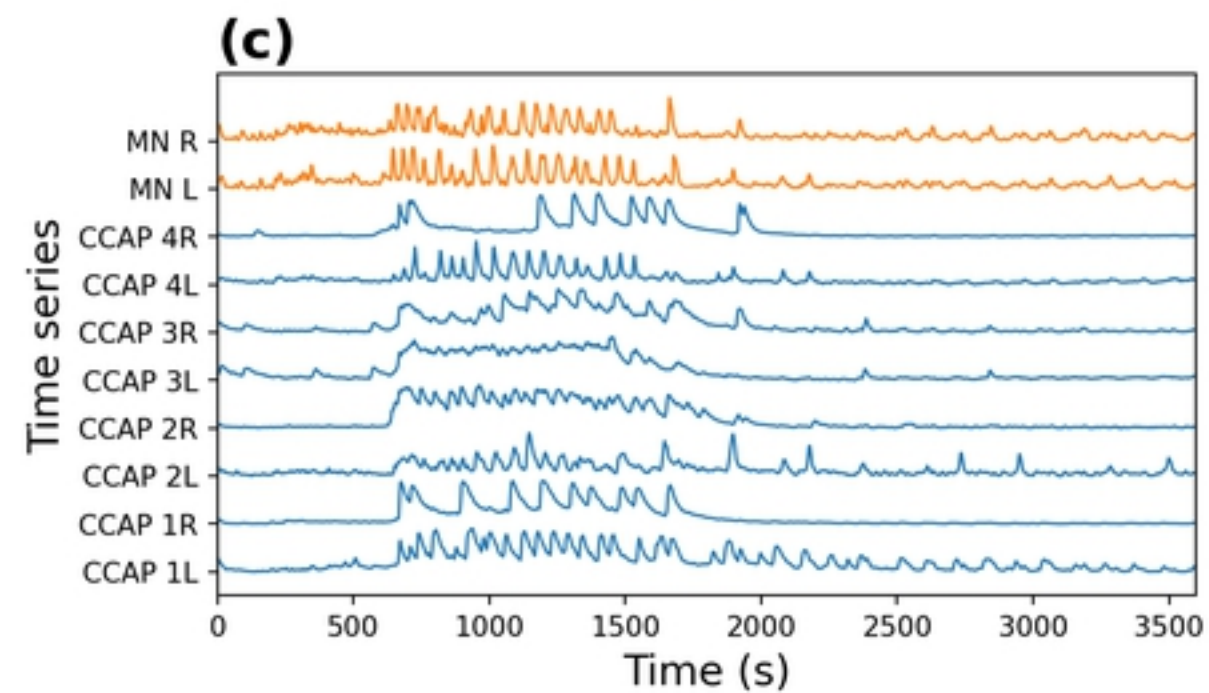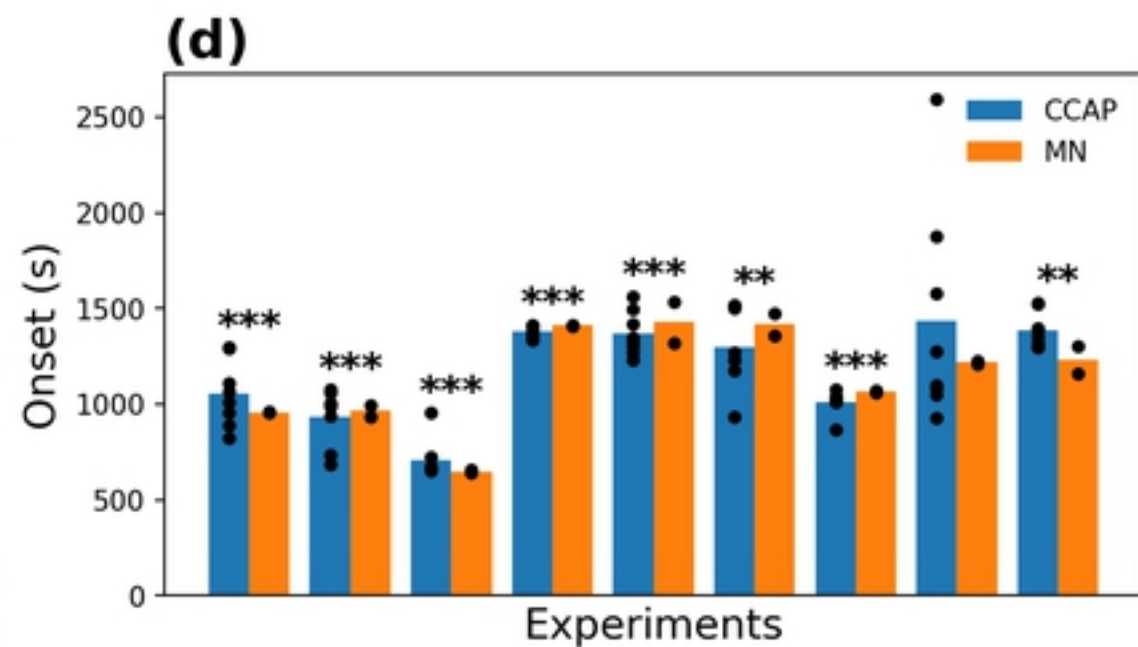

Figure 1

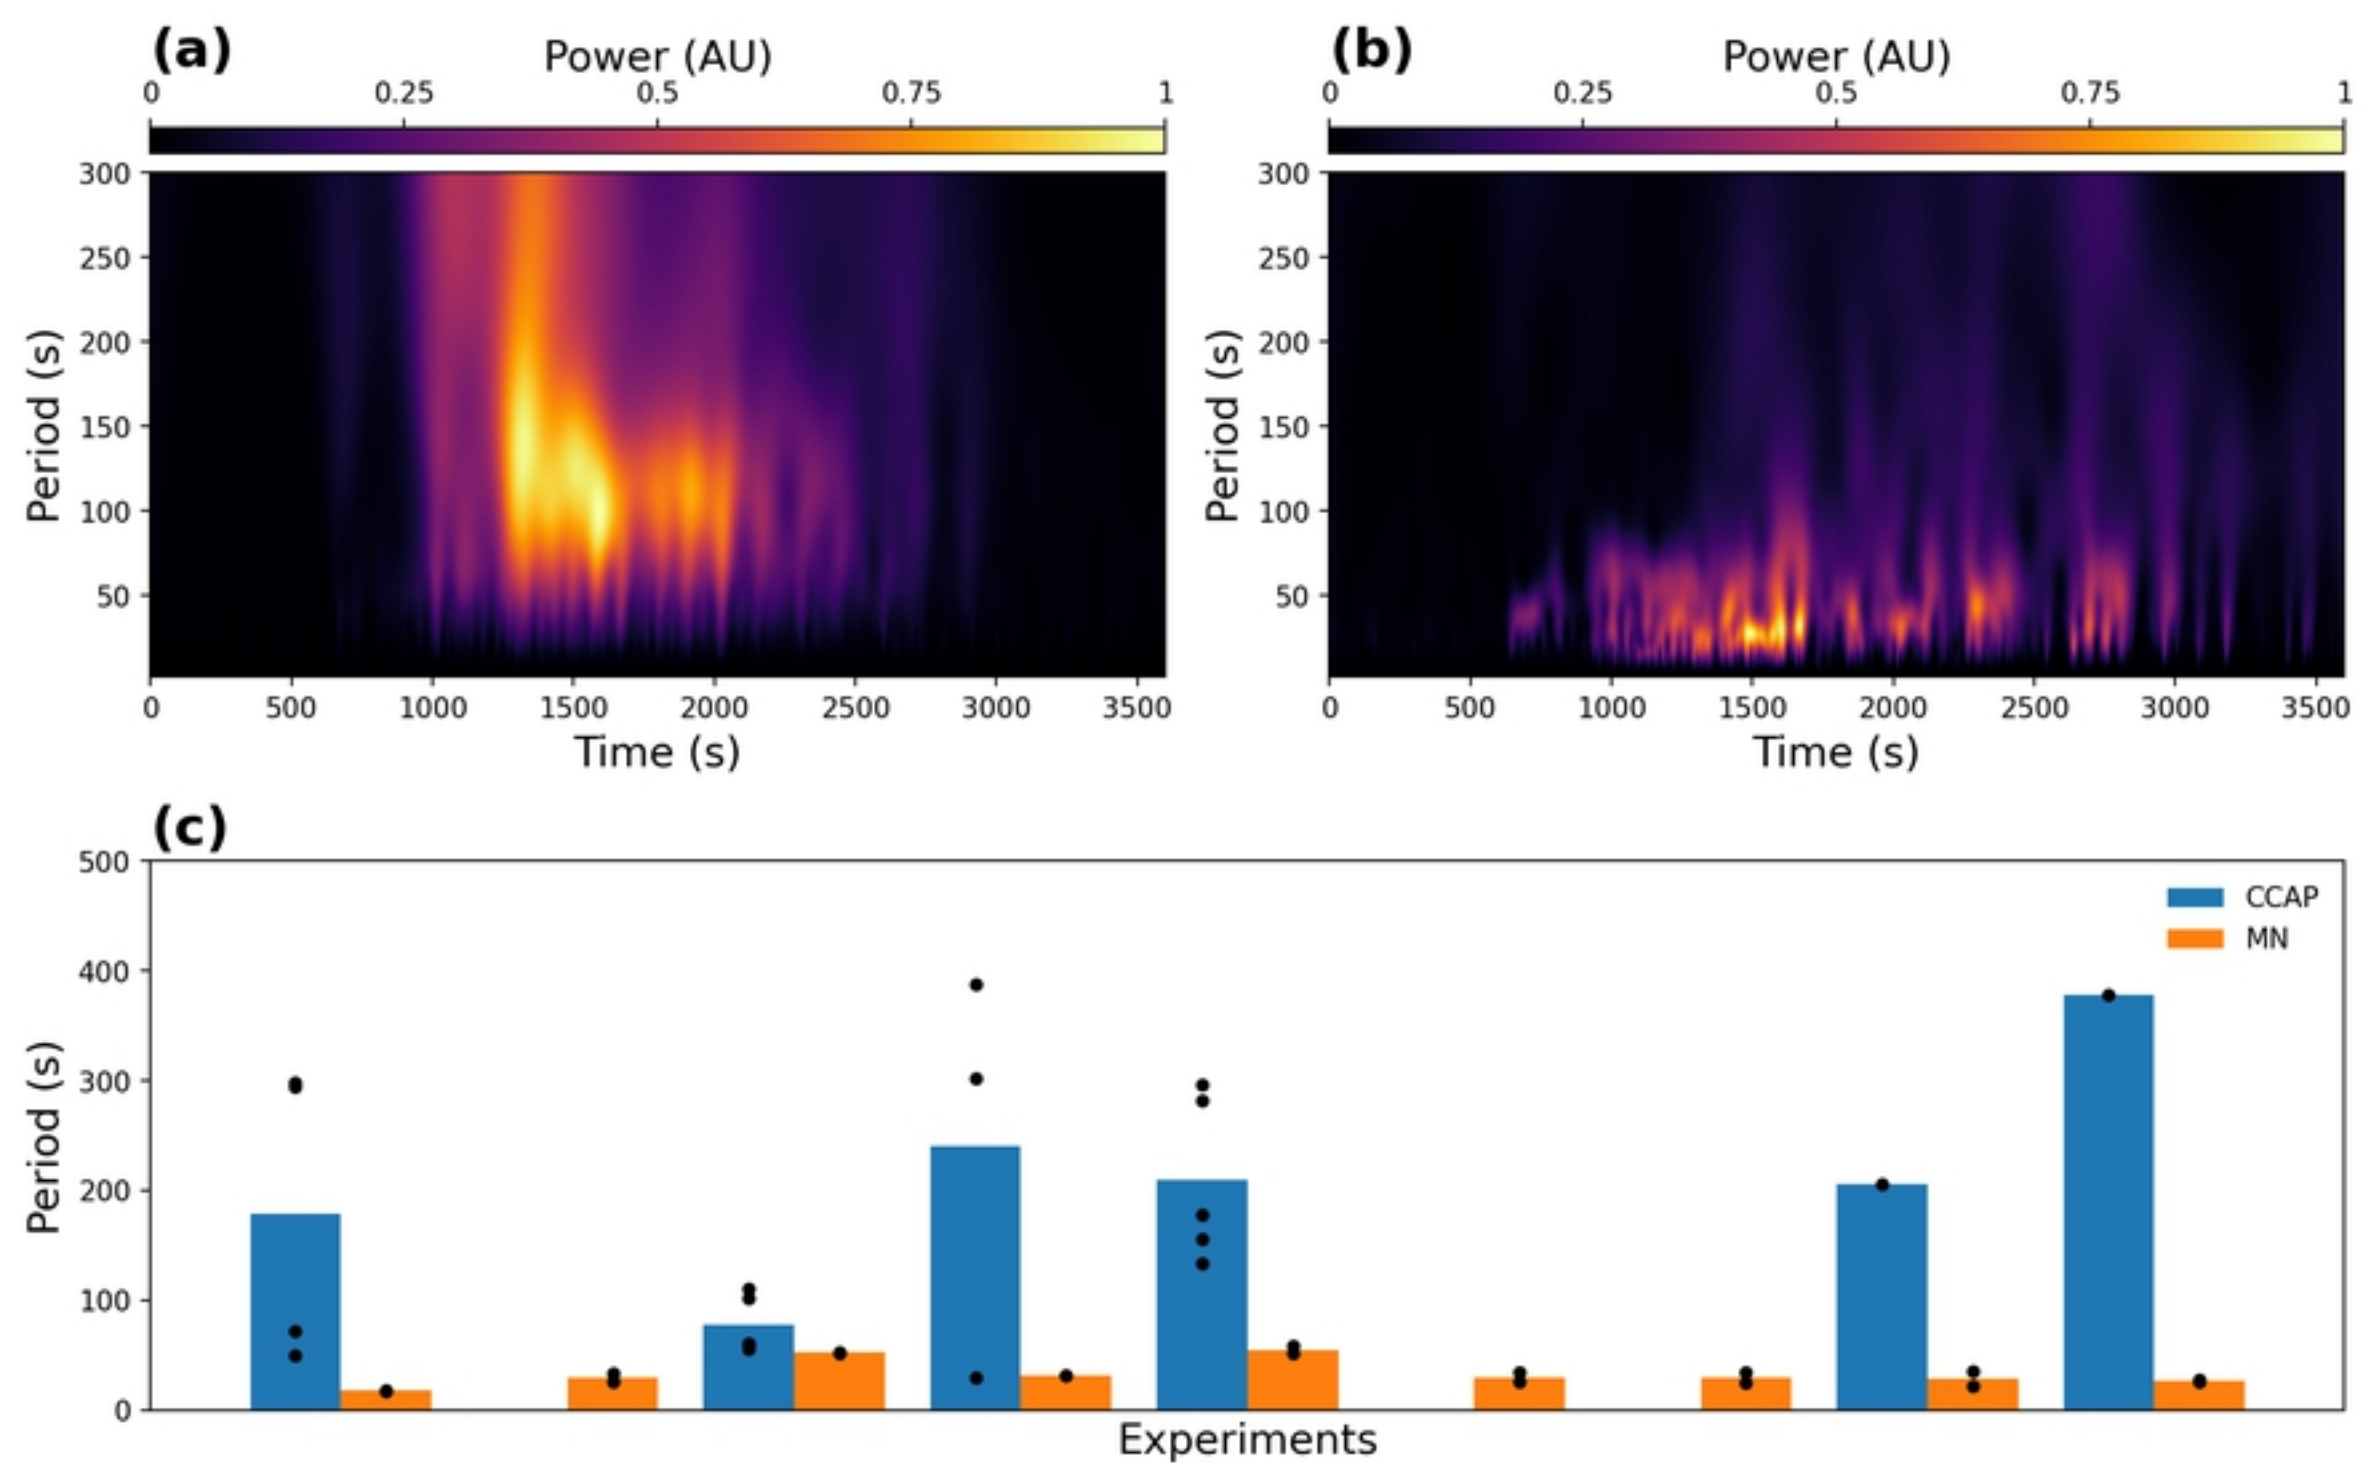

Figure 2

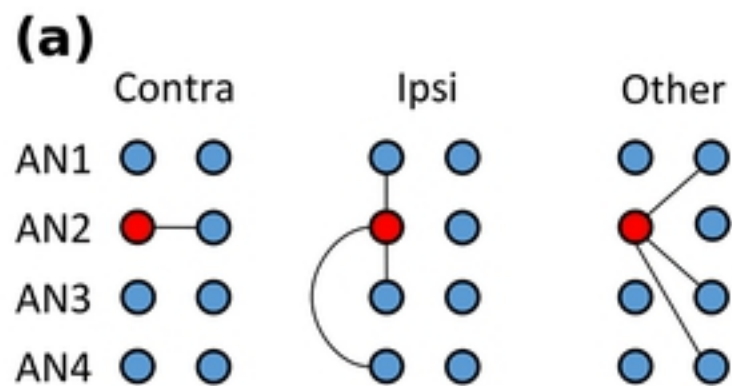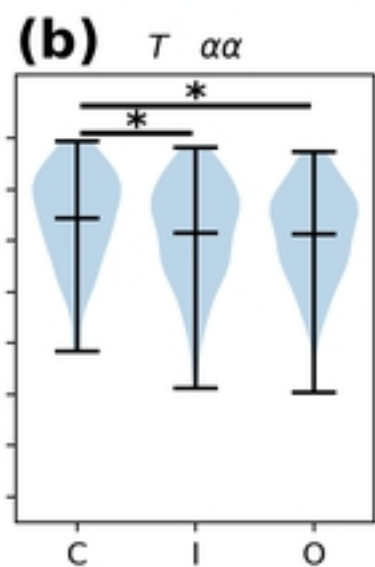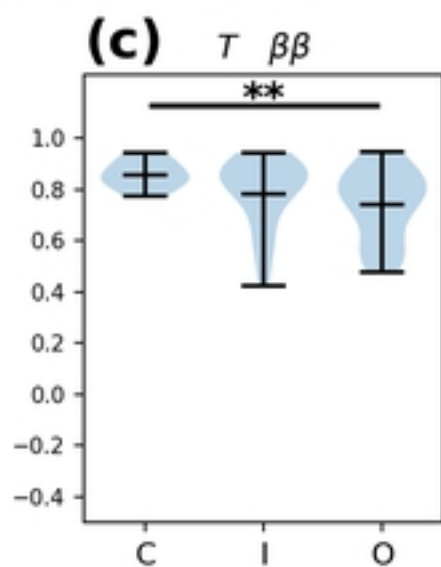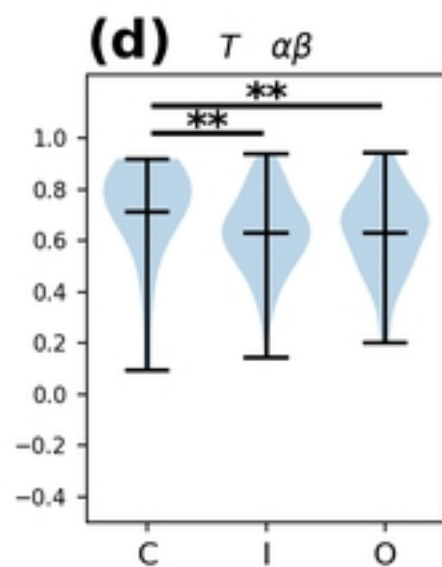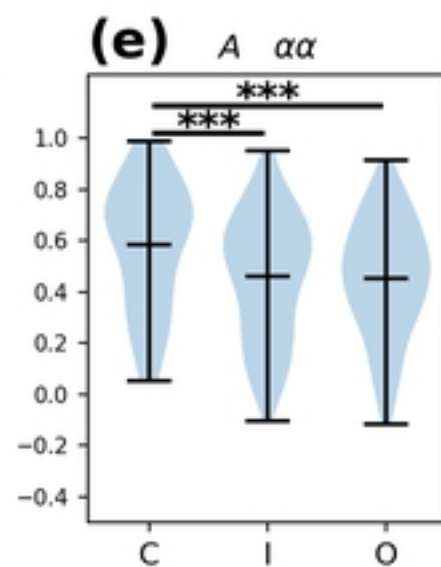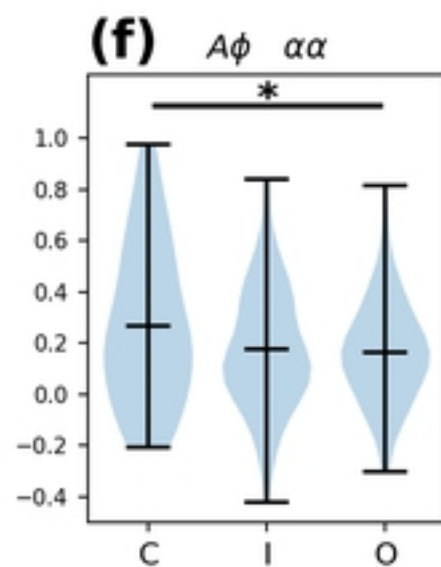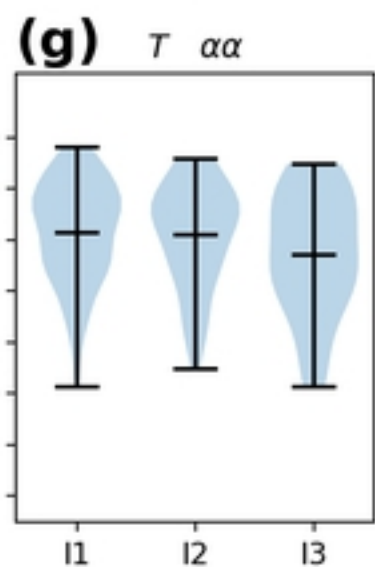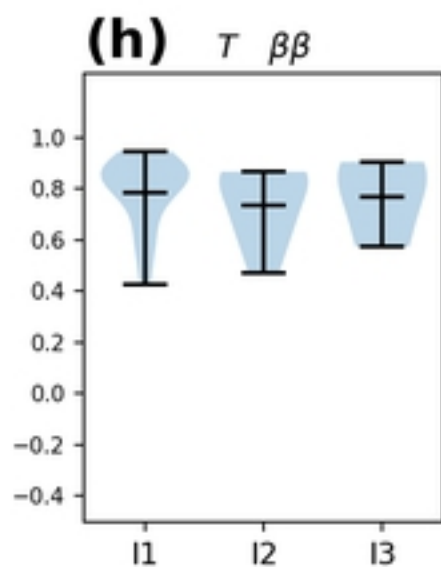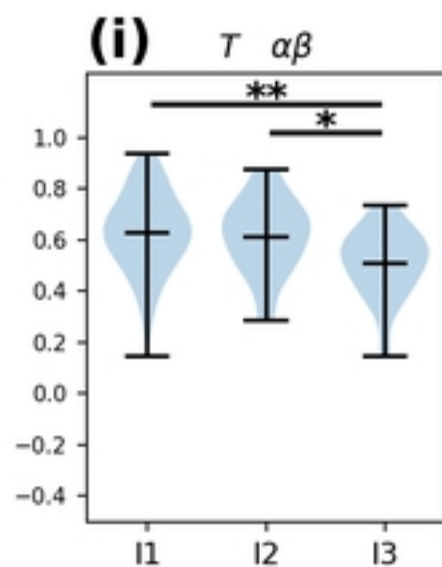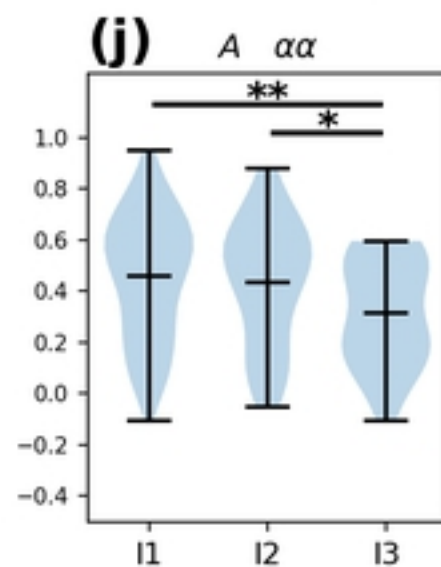

Figure 3

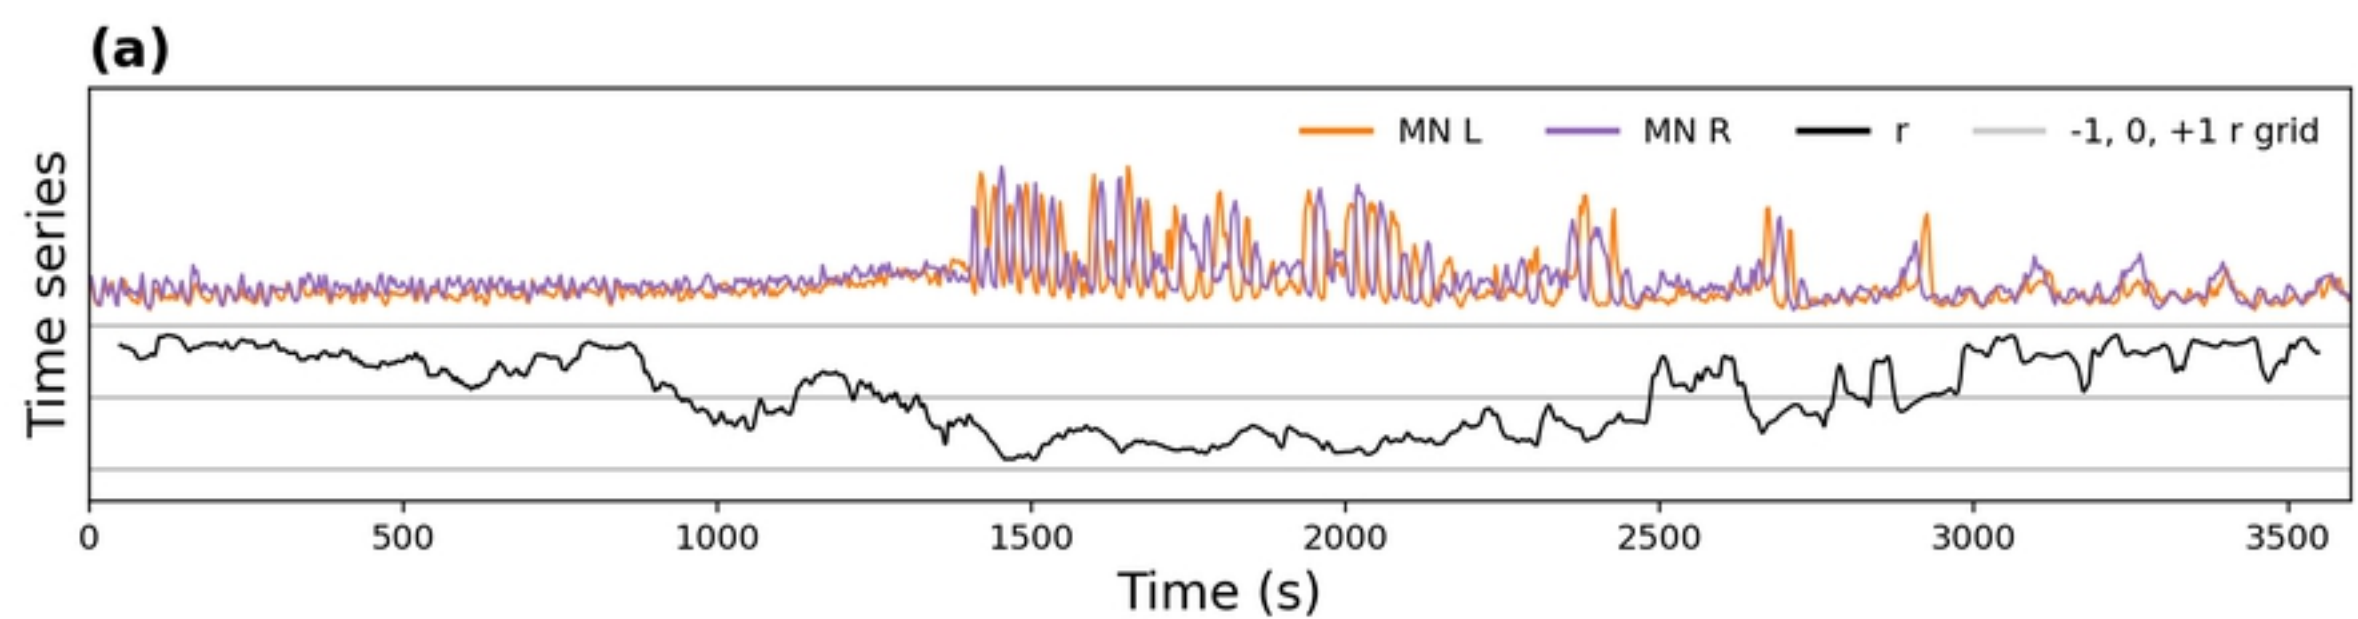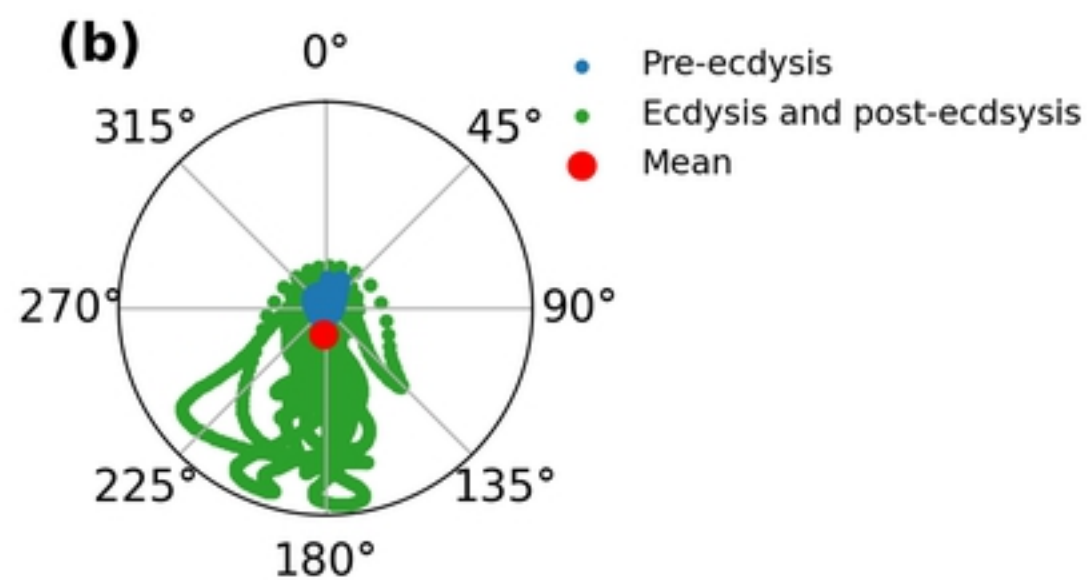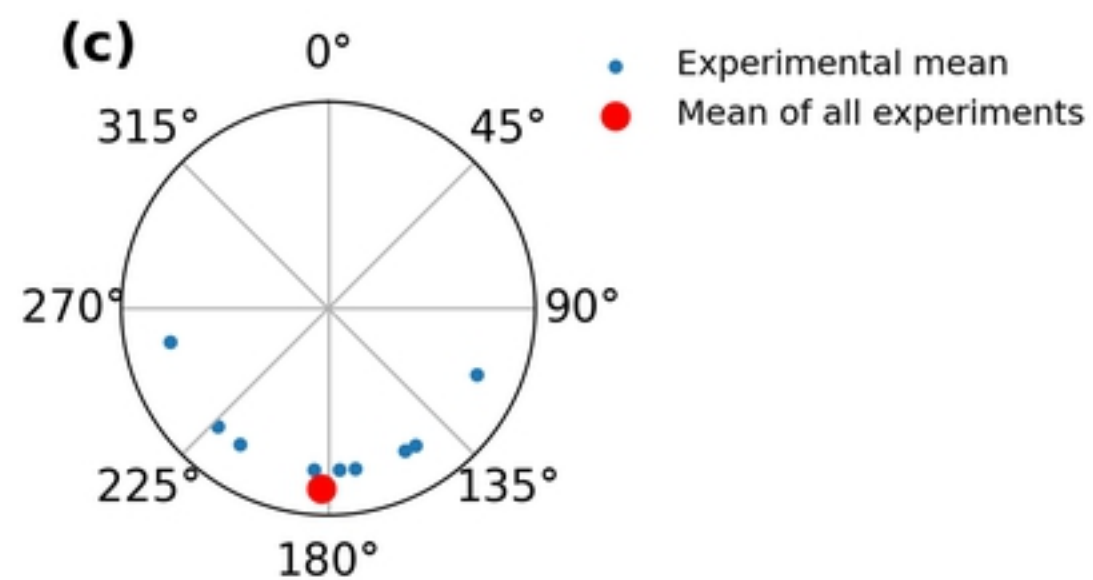

Figure 4

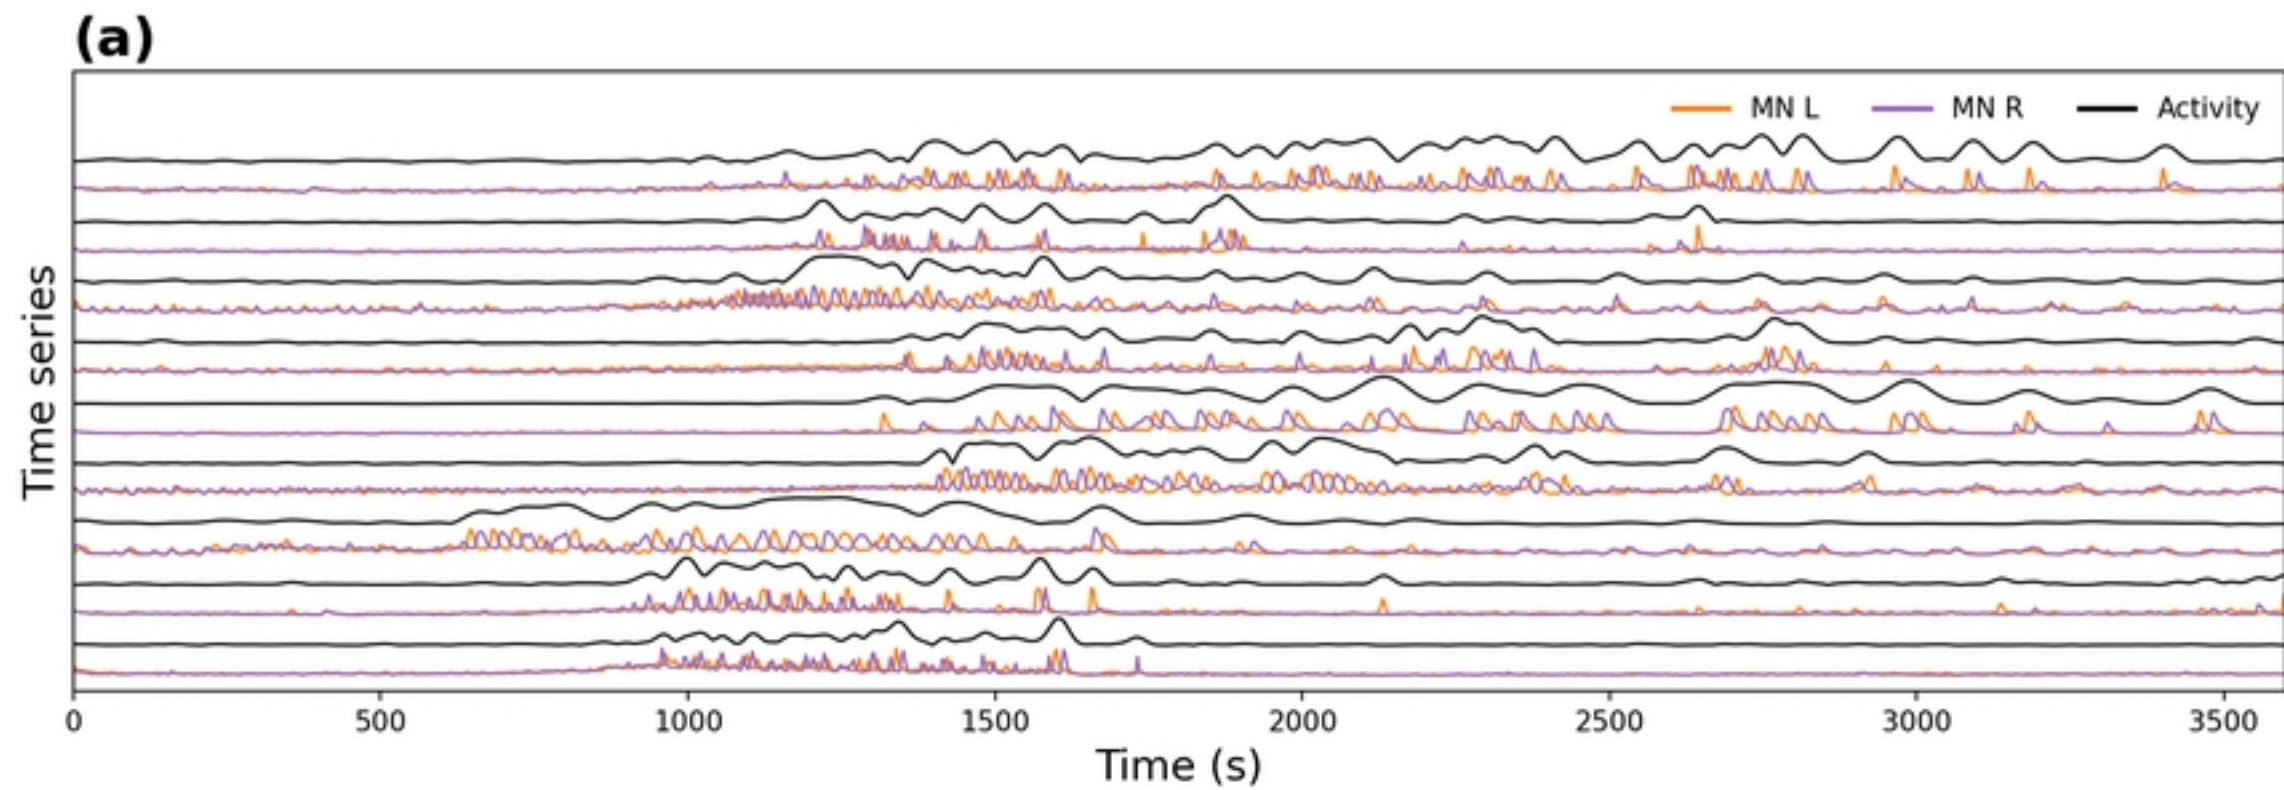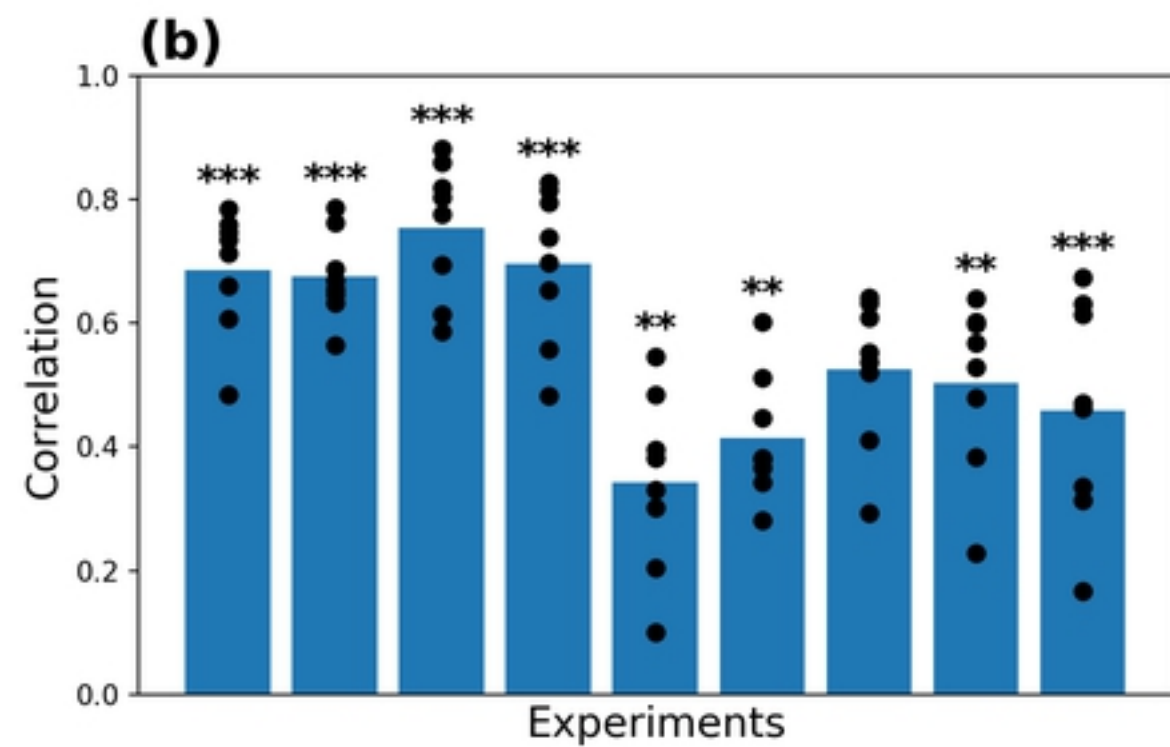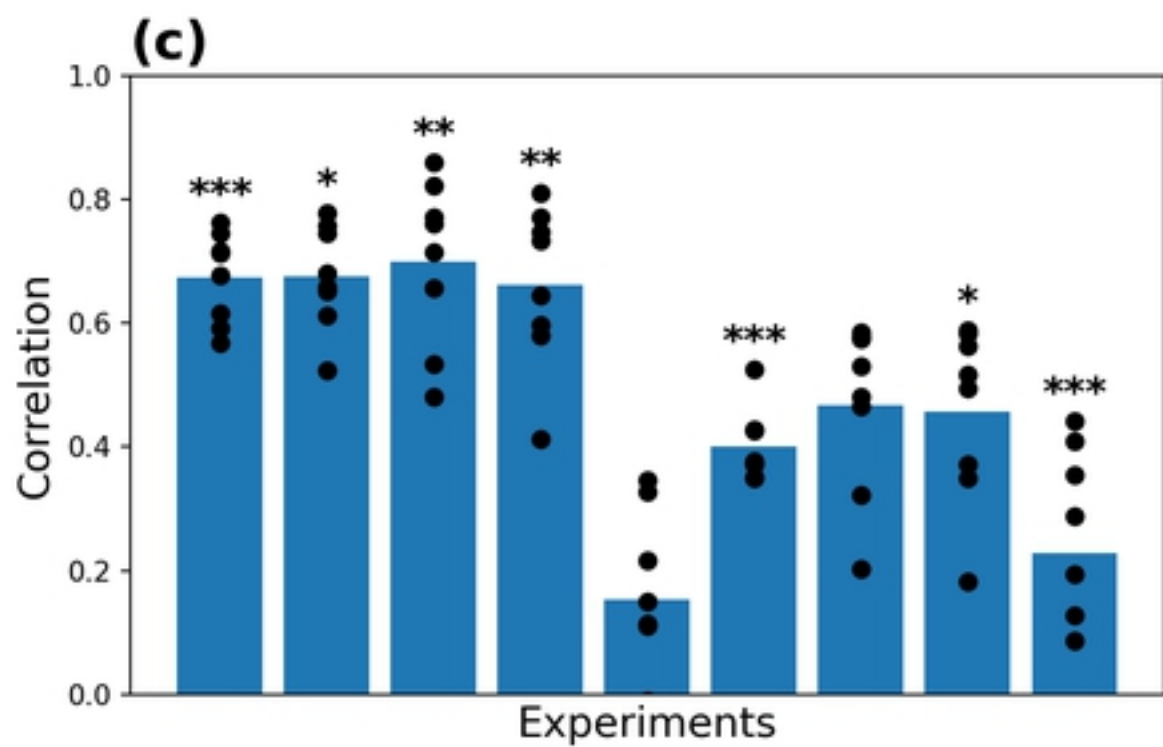

Figure 5

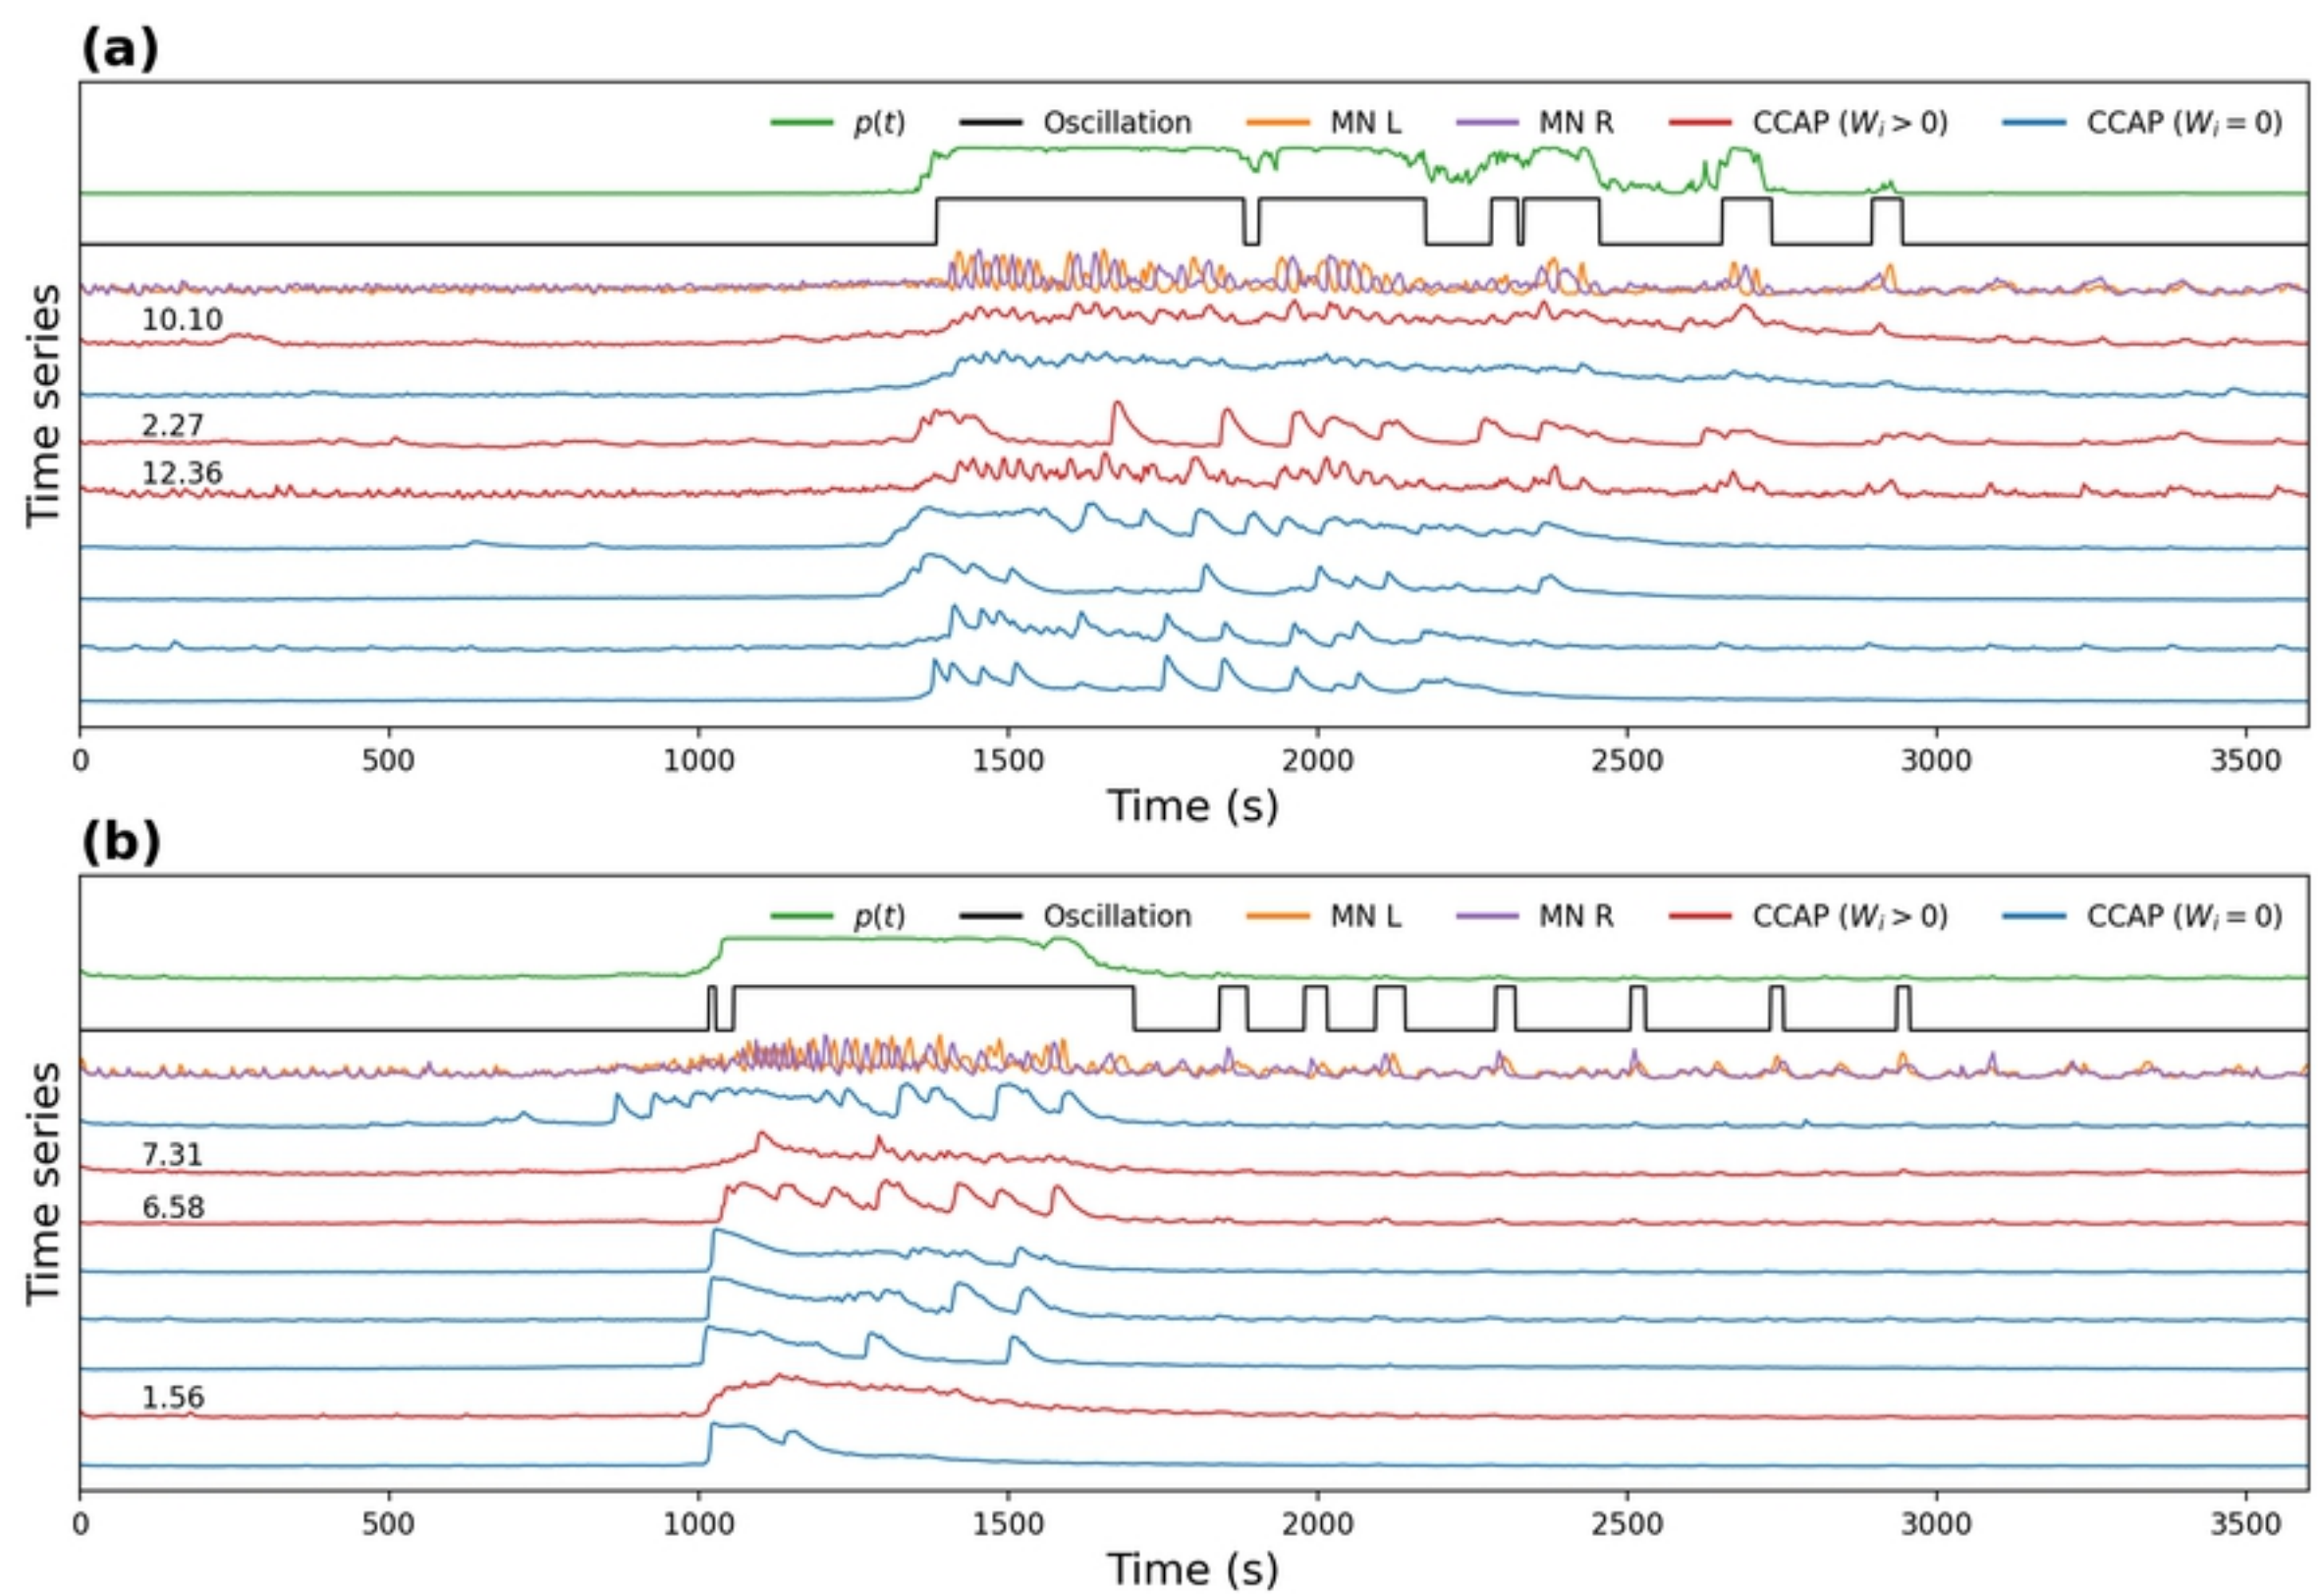

Figure 6

**(a)**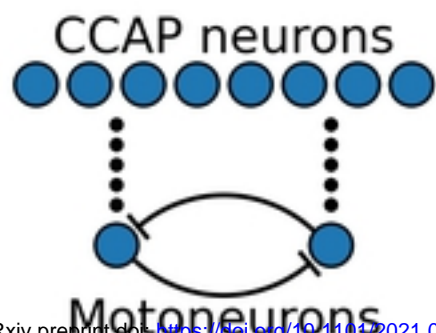

bioRxiv preprint doi: <https://doi.org/10.1101/2021.04.06.438565>; this version posted April 6, 2021. The copyright holder for this preprint (which was not certified by peer review) is the author/funder, who has granted bioRxiv a license to display the preprint in perpetuity. It is made available under aCC-BY 4.0 International license.

**(b)**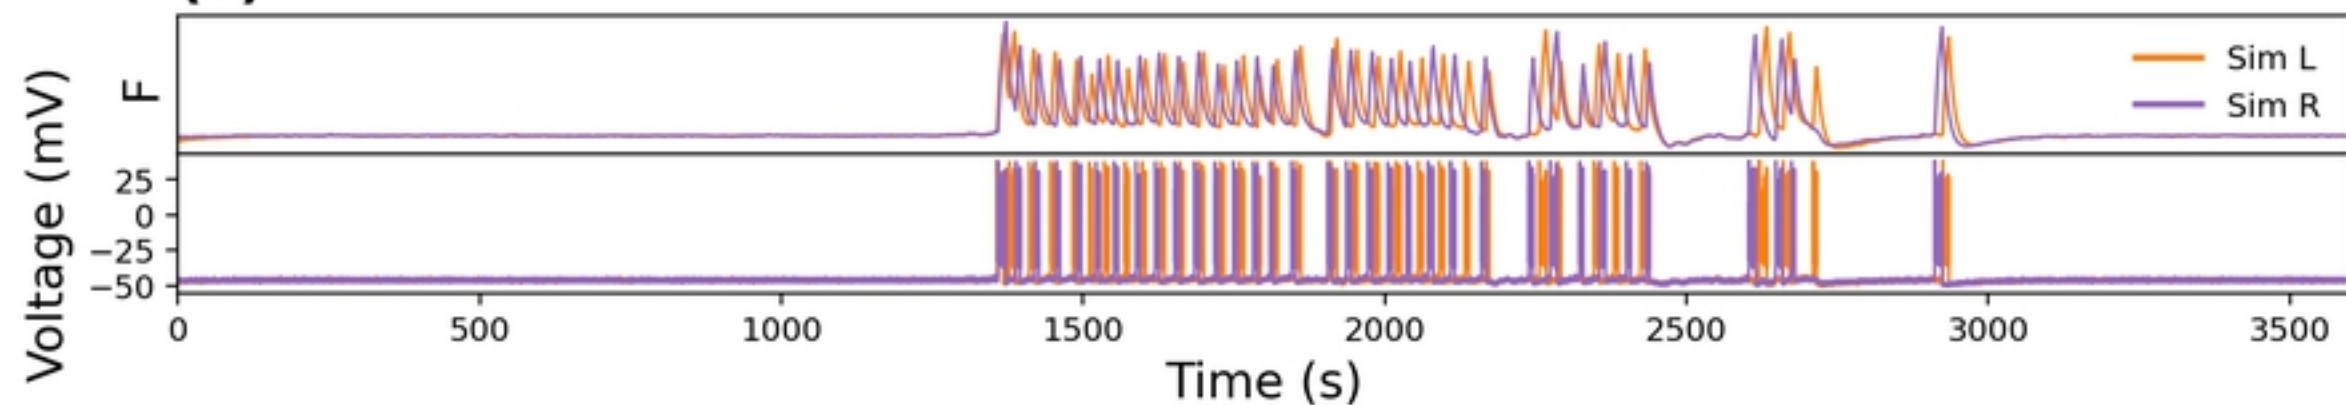**(c)**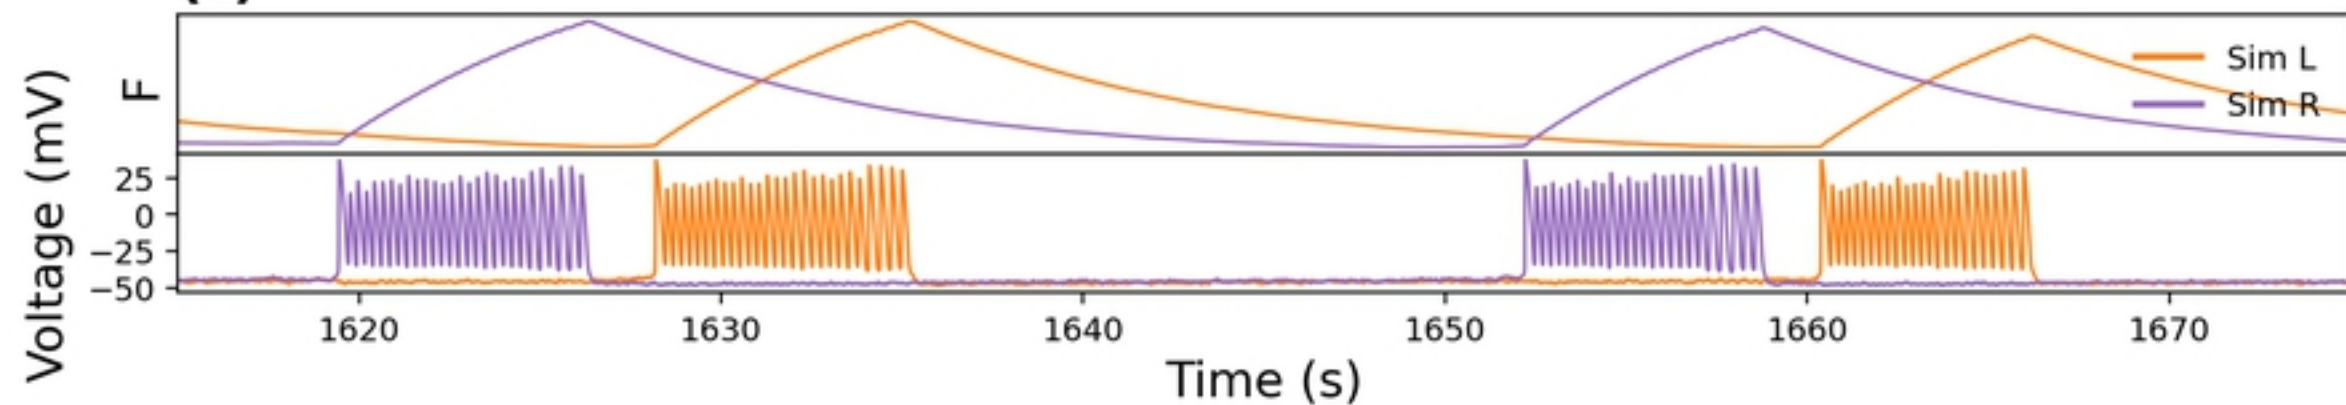**(d)**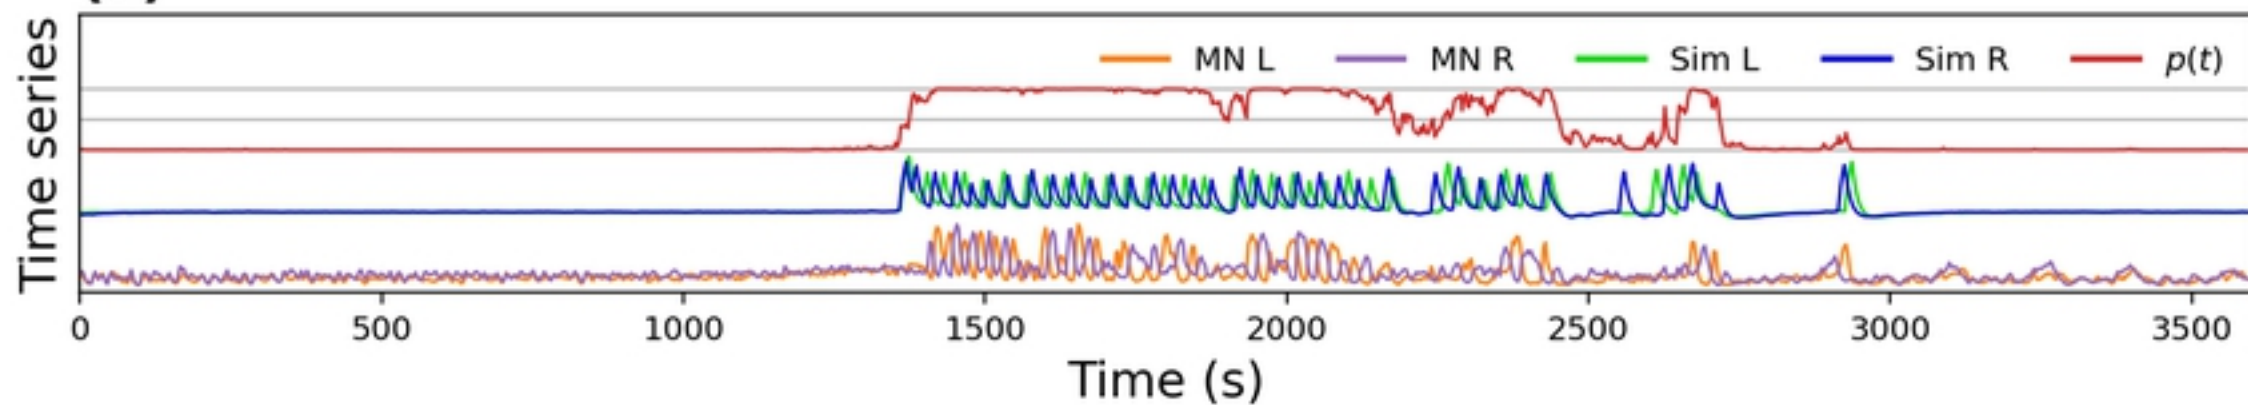**(e)**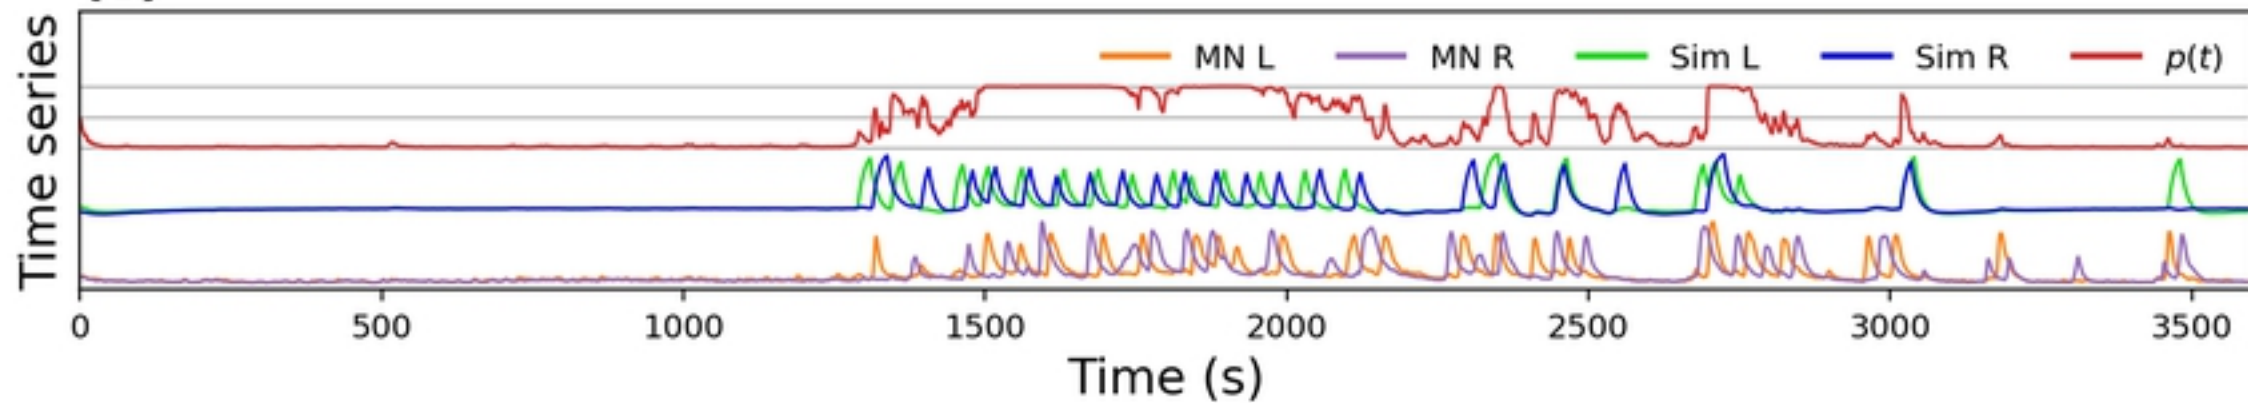

Figure 7

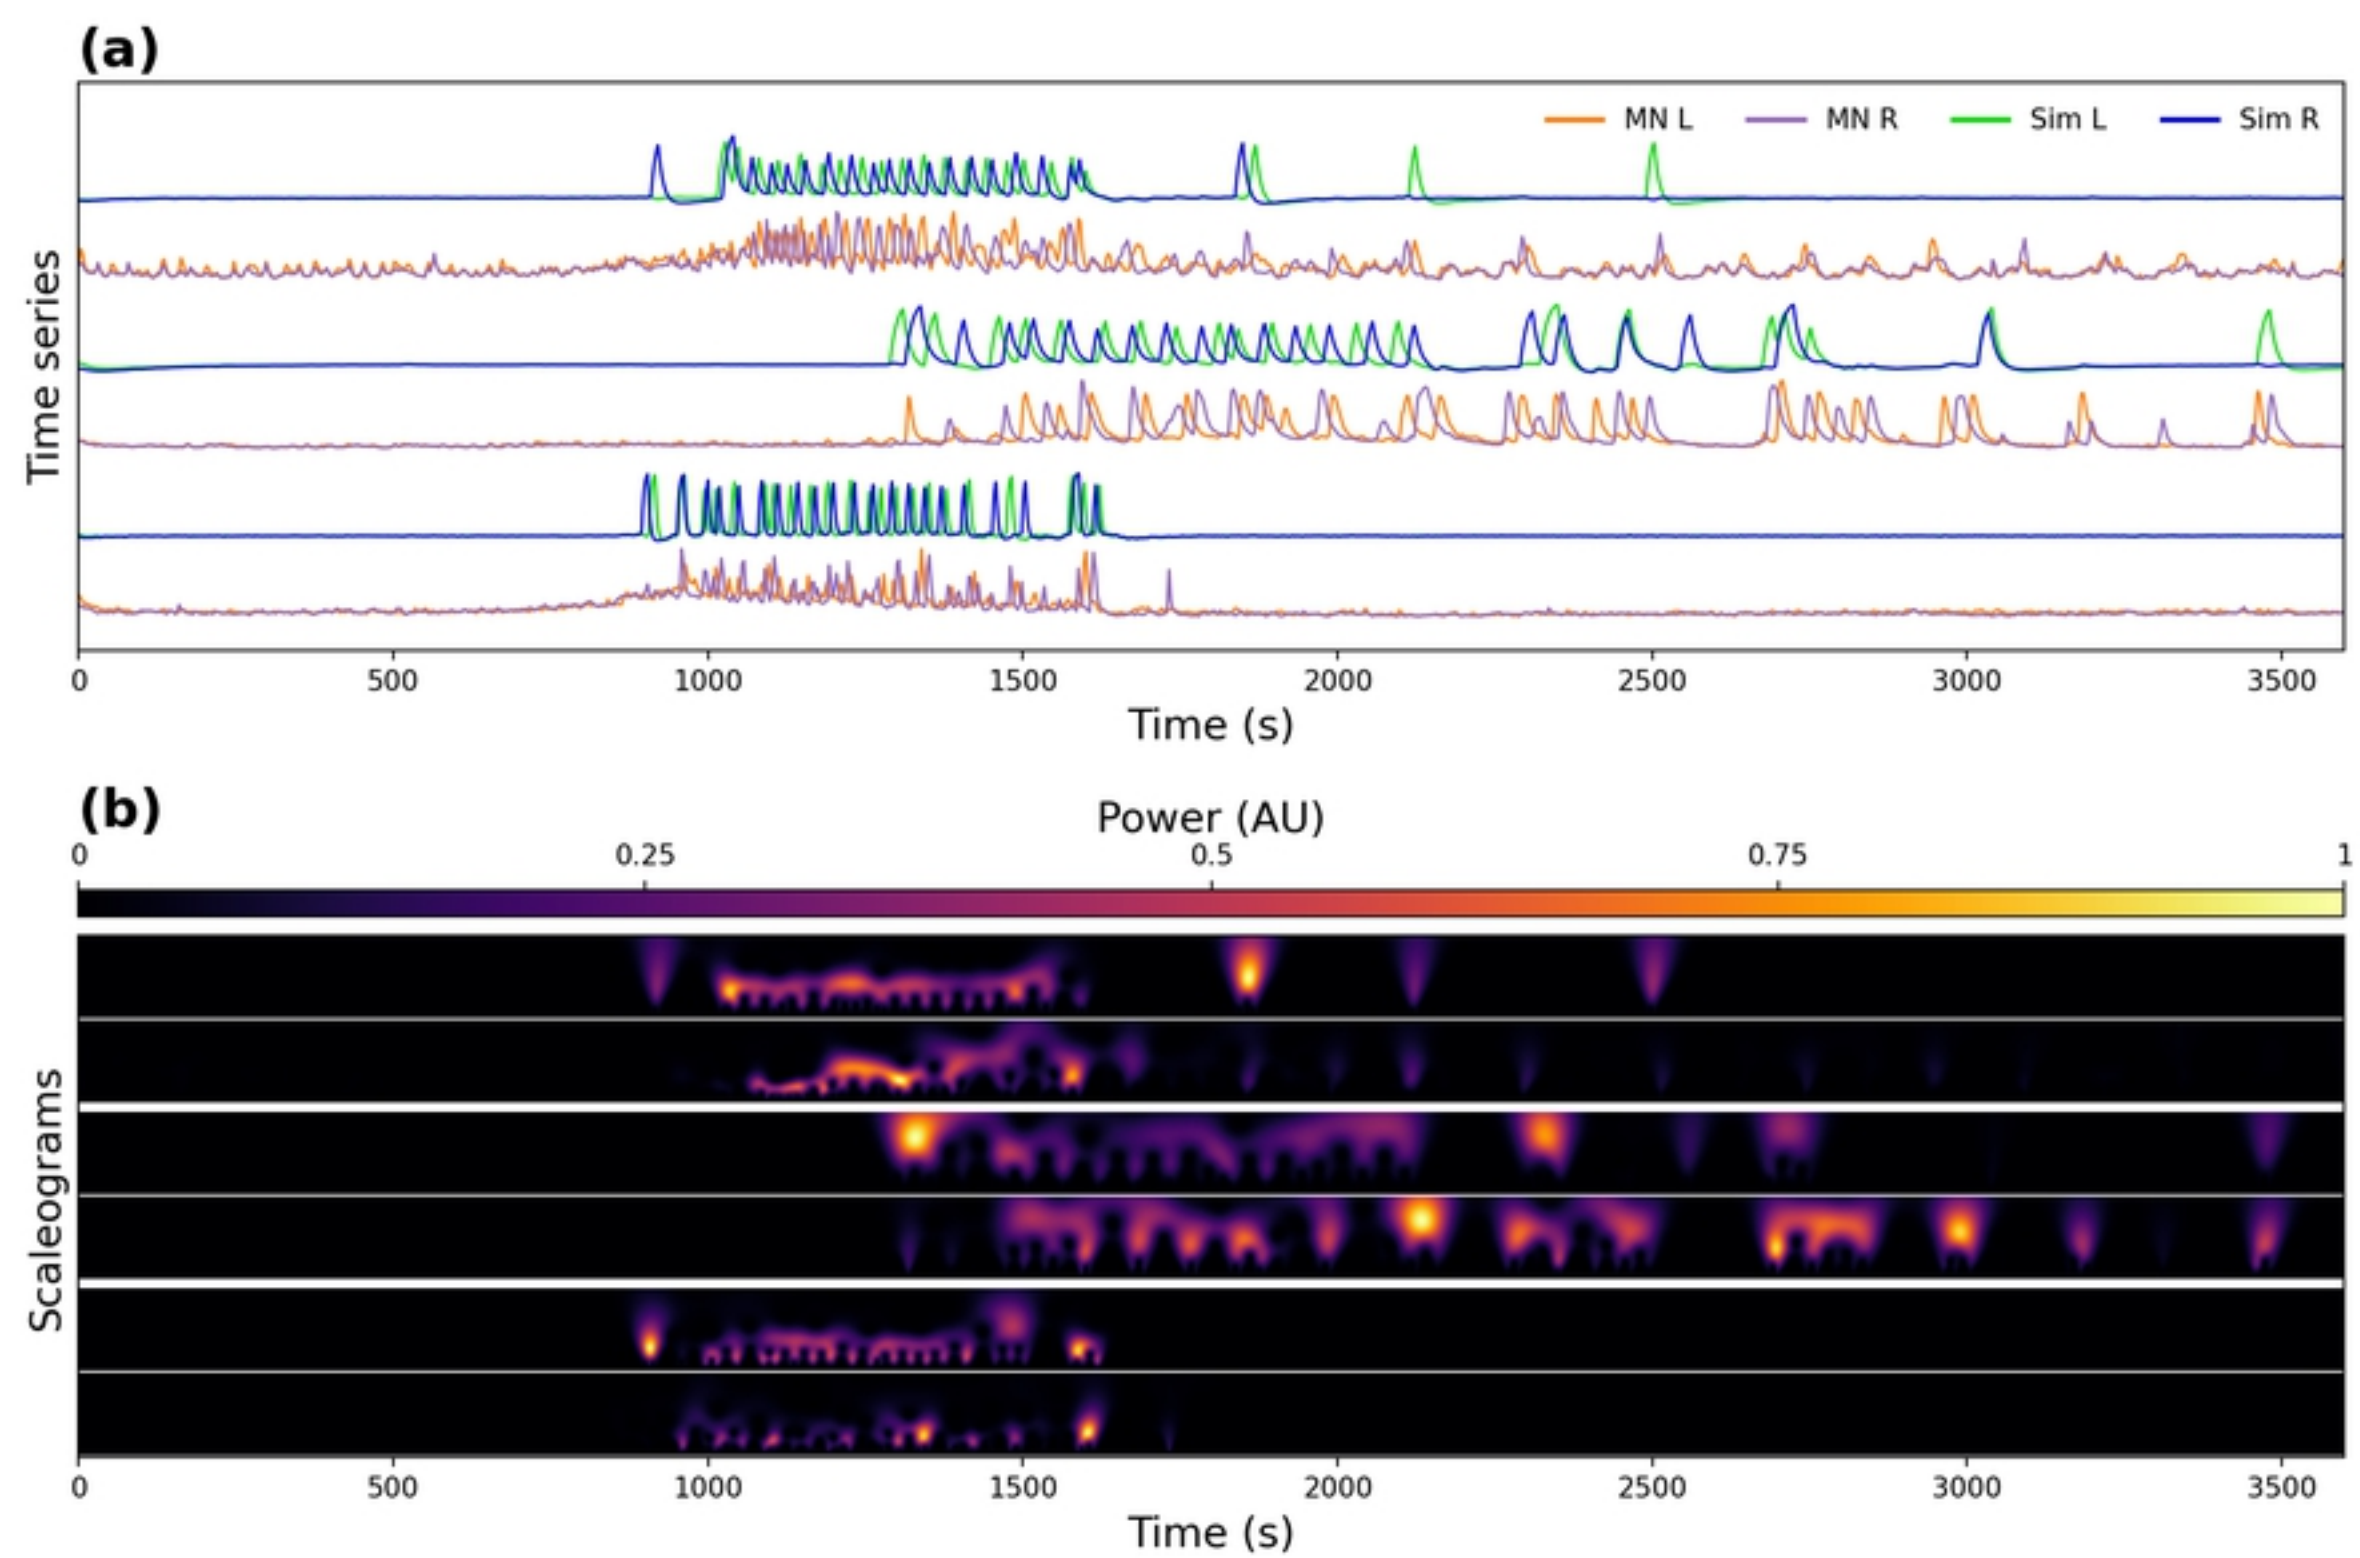

Figure 8



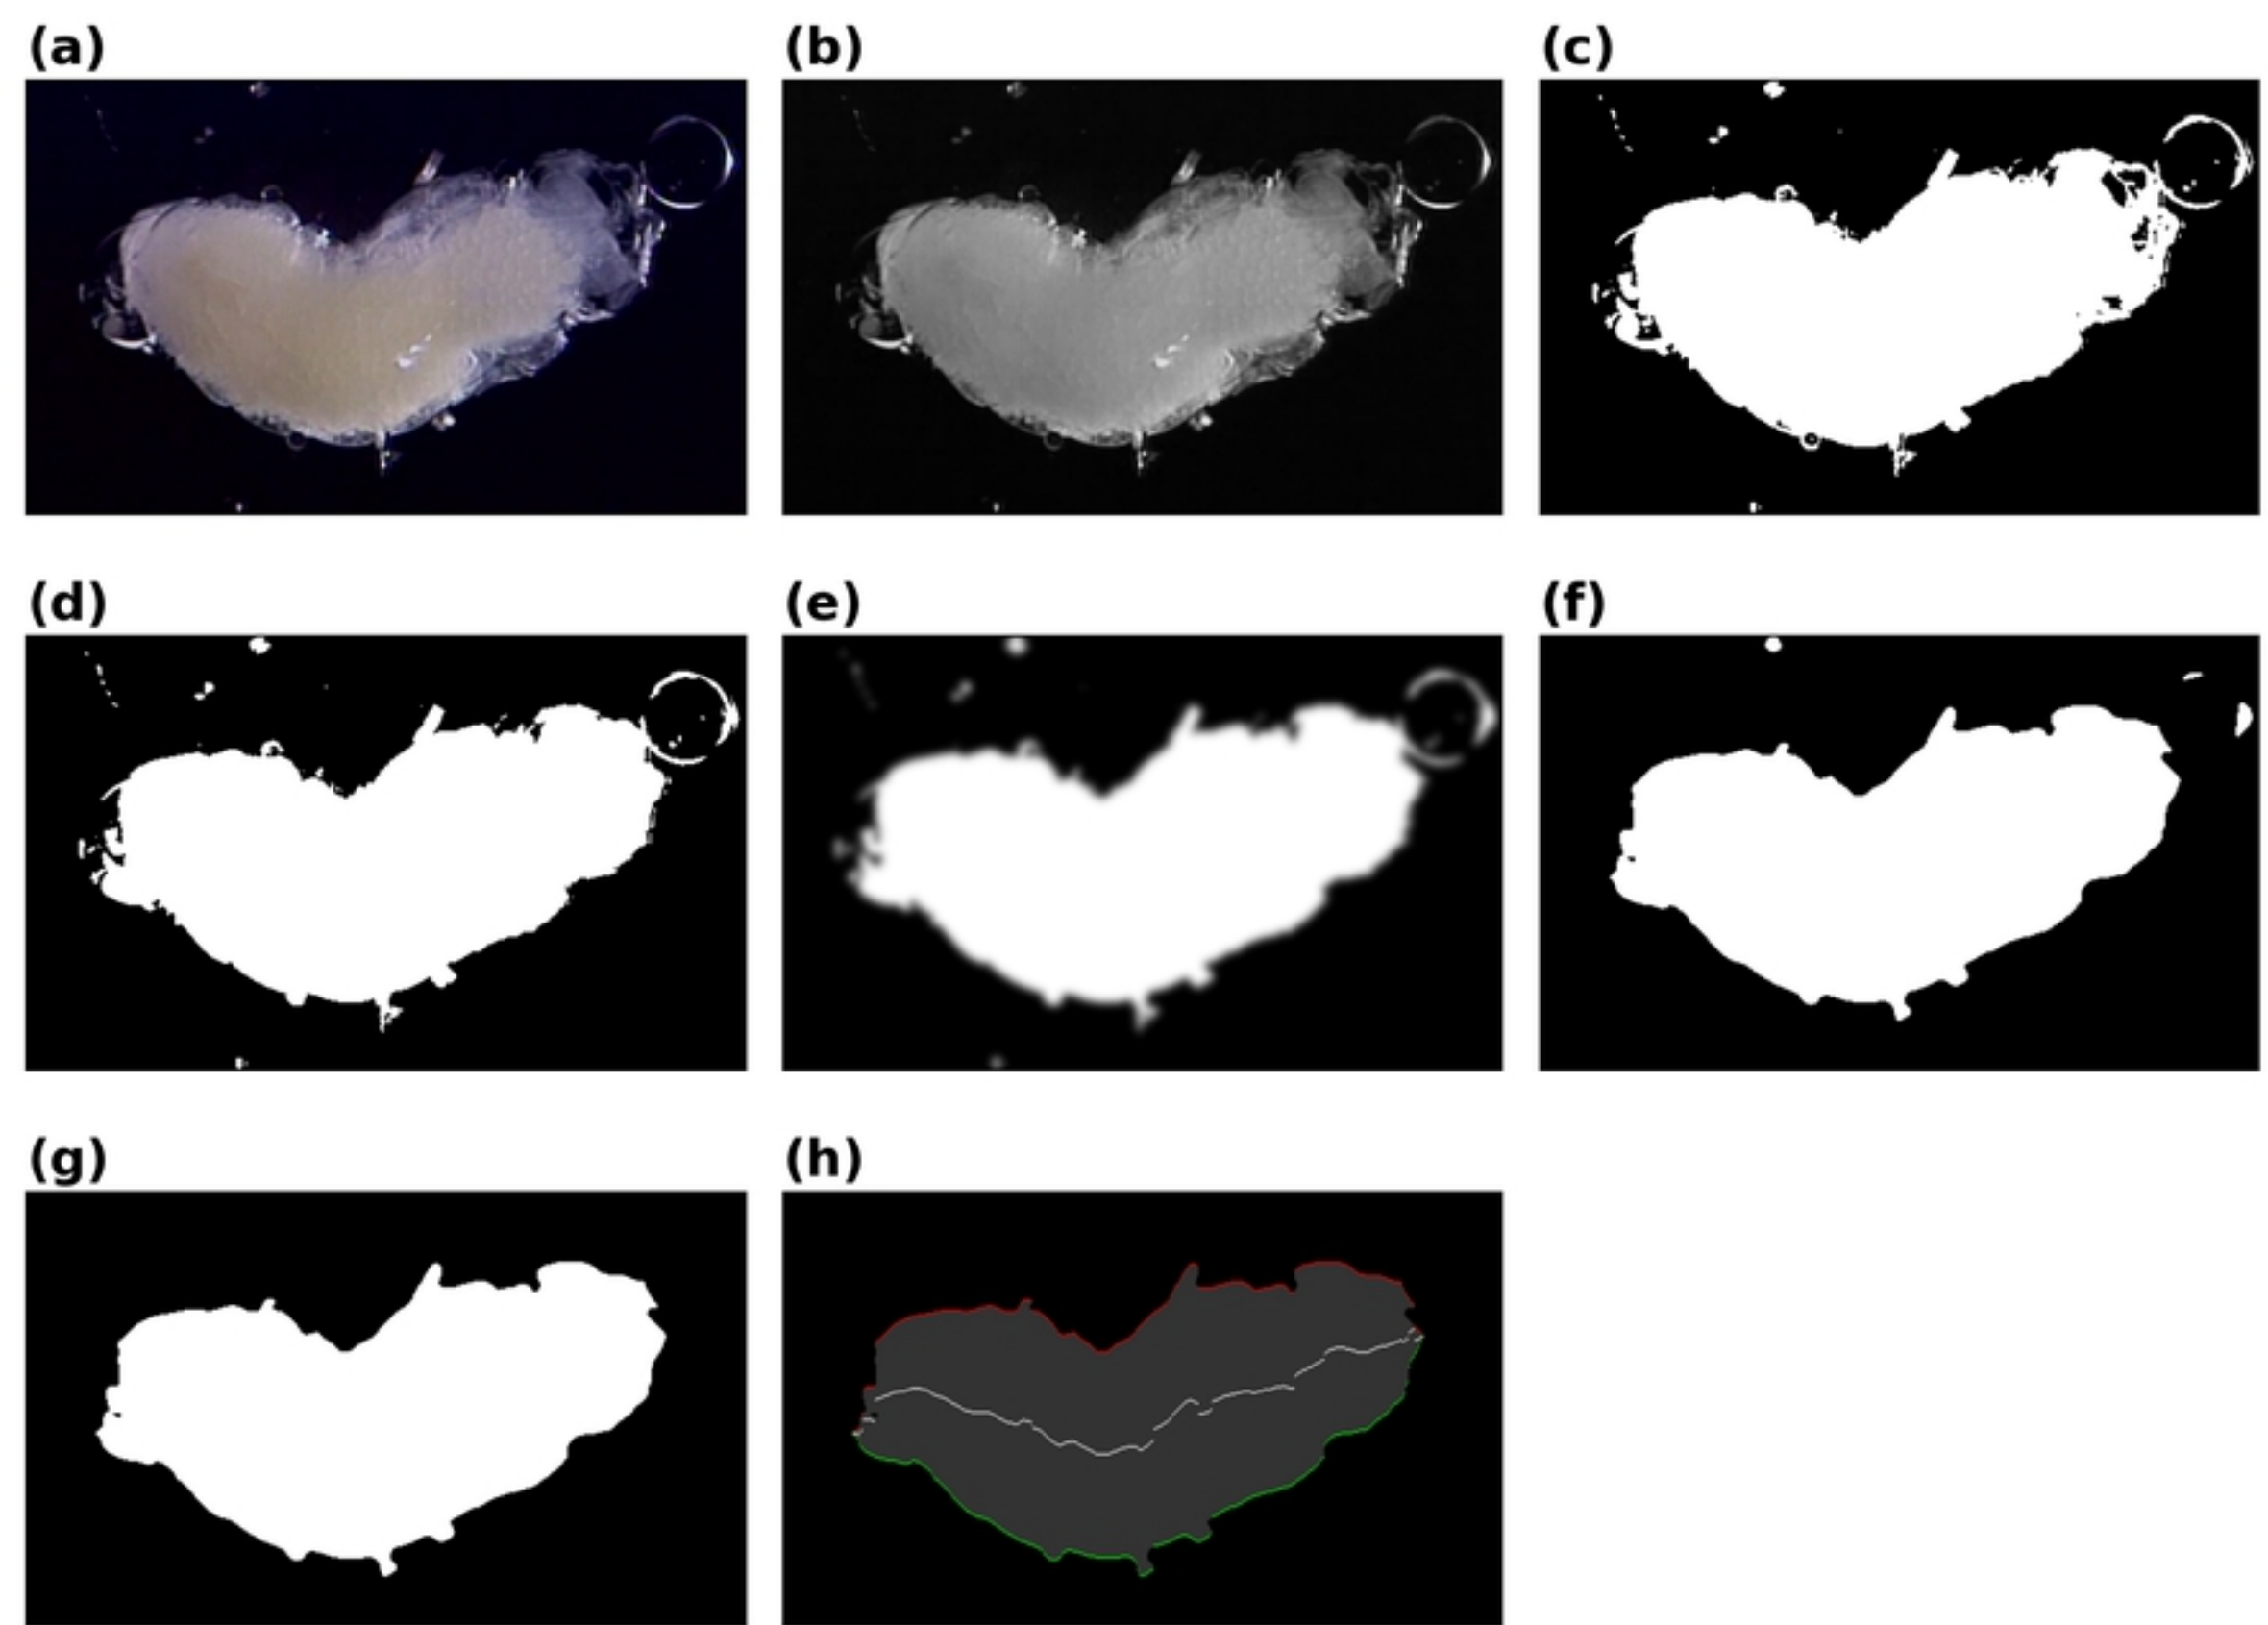

Figure 9

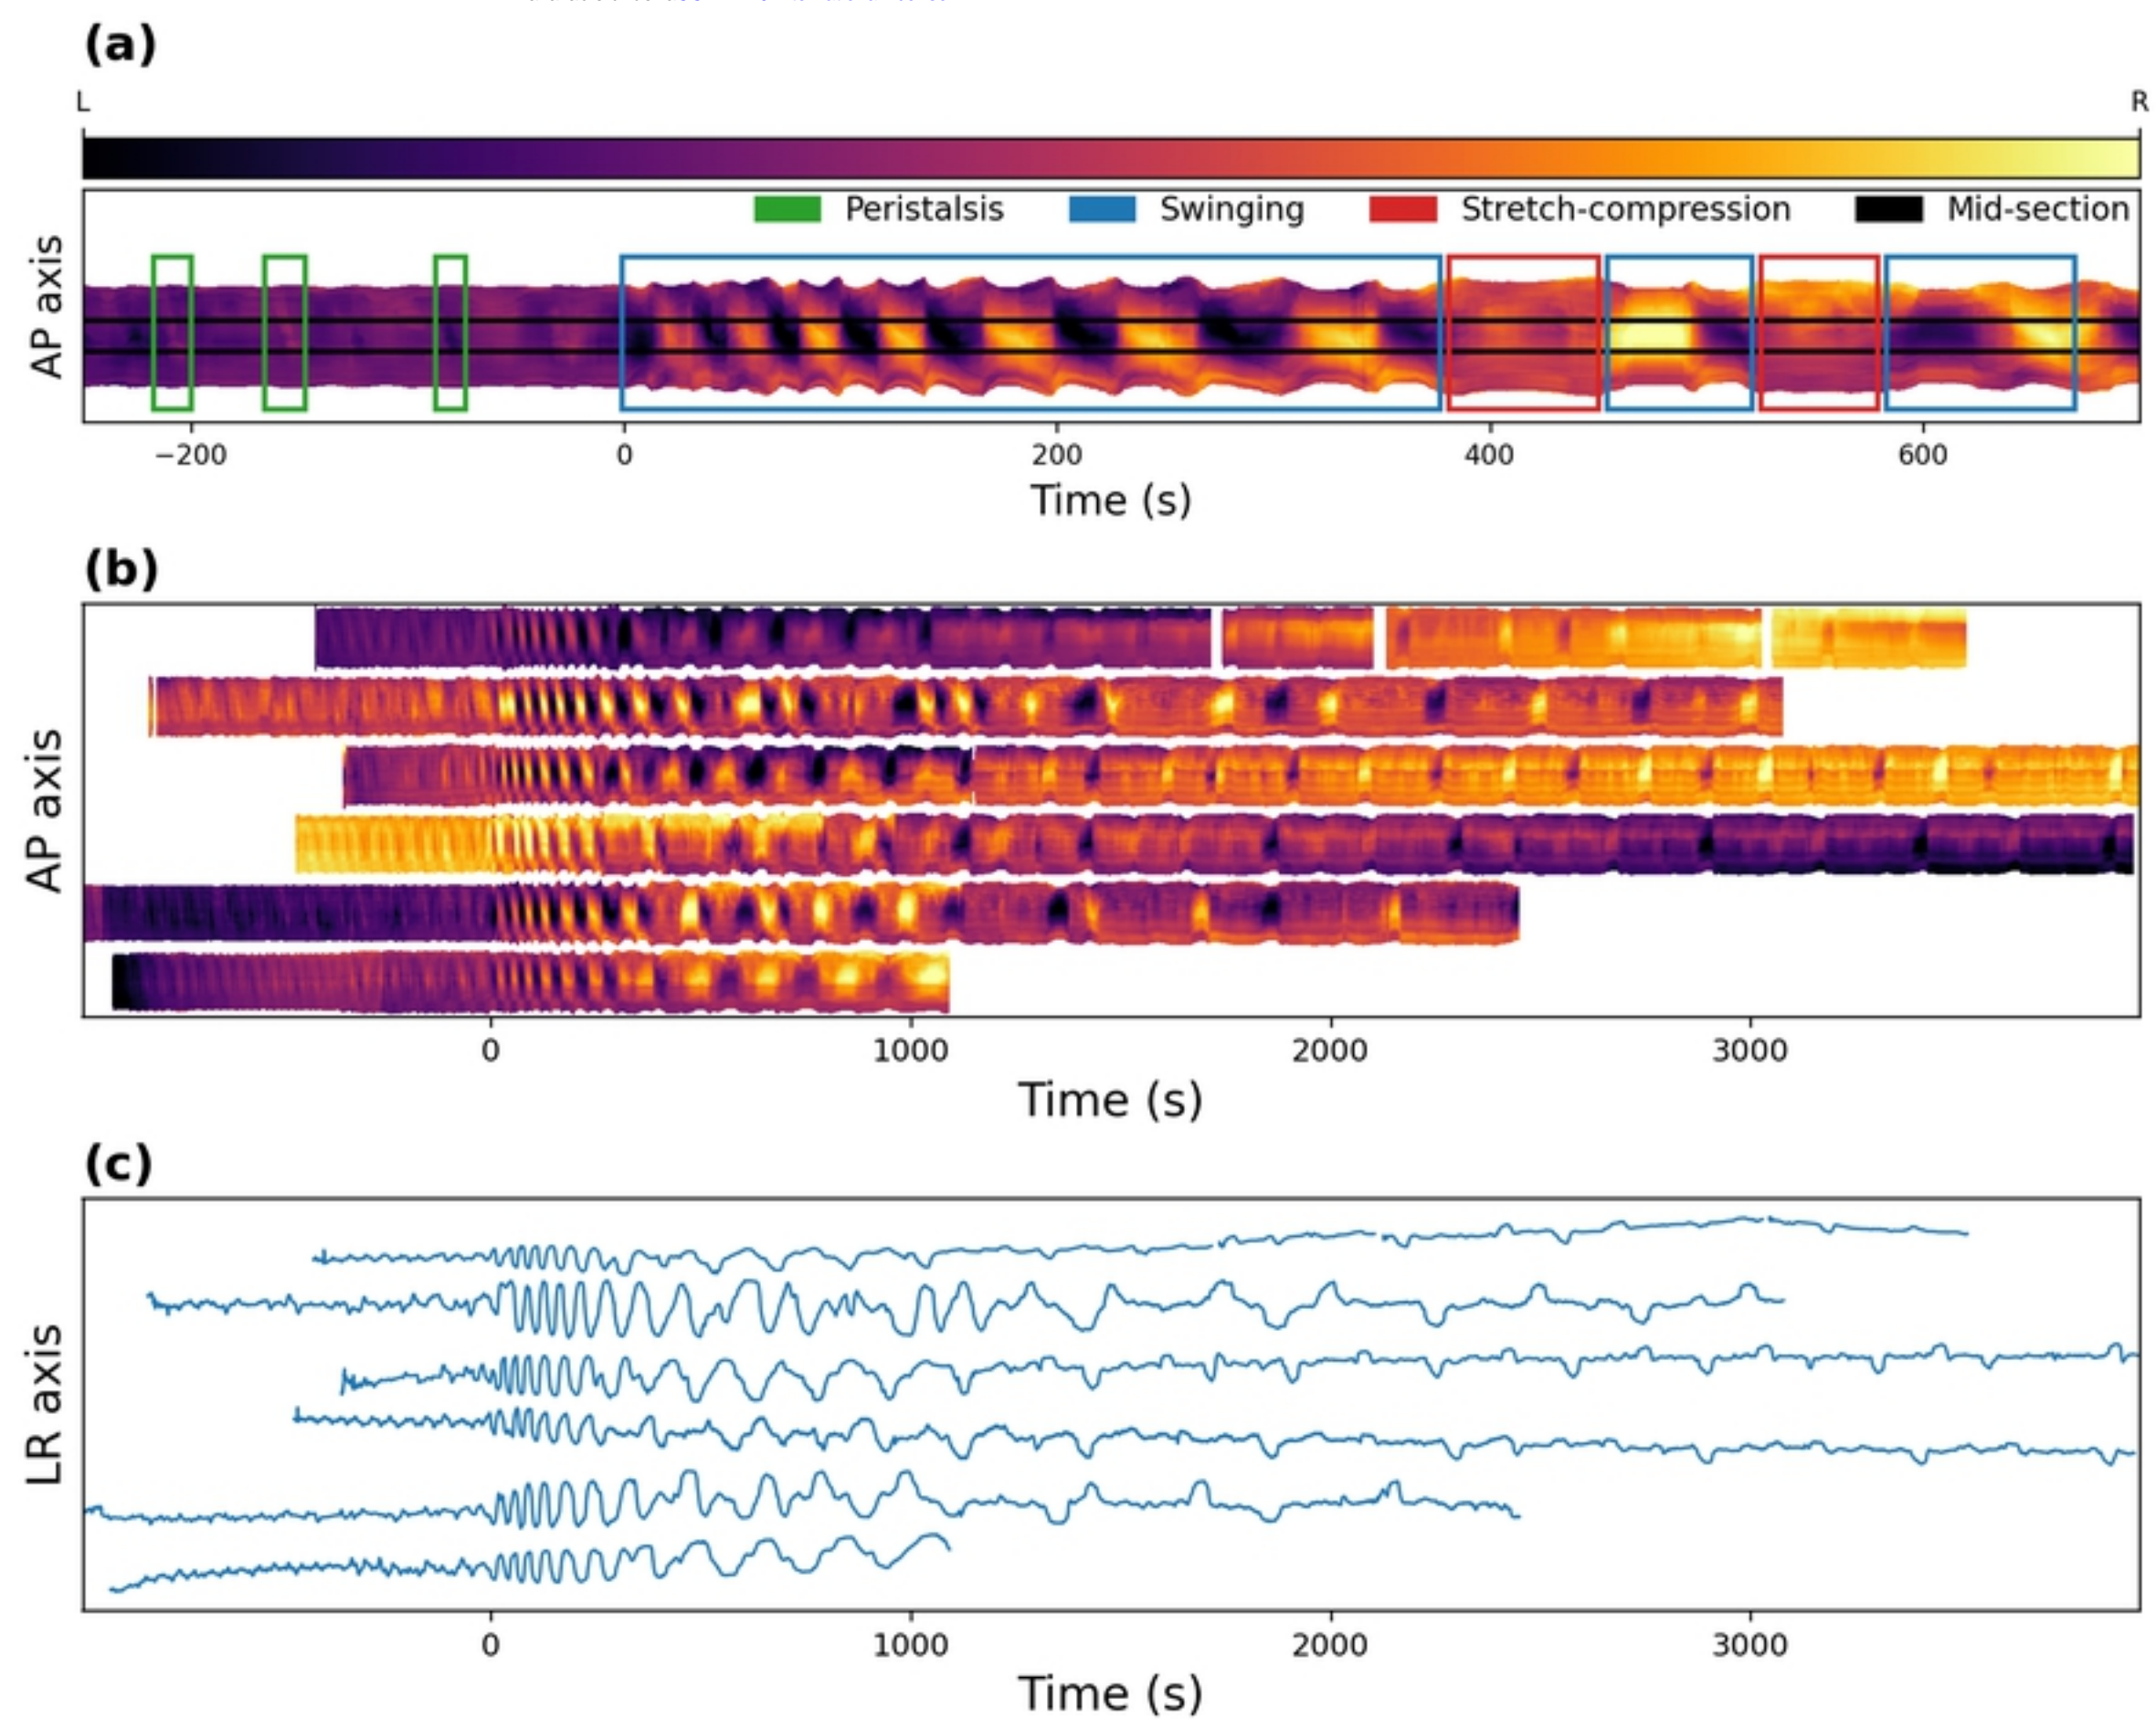

Figure 10

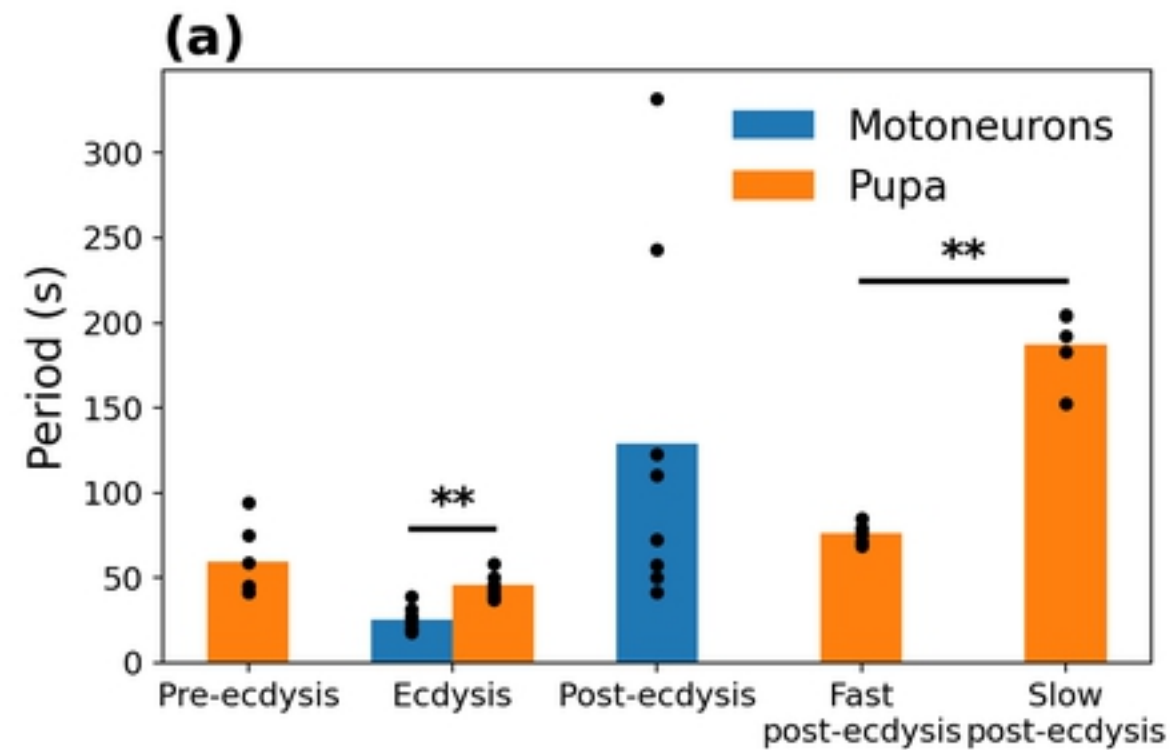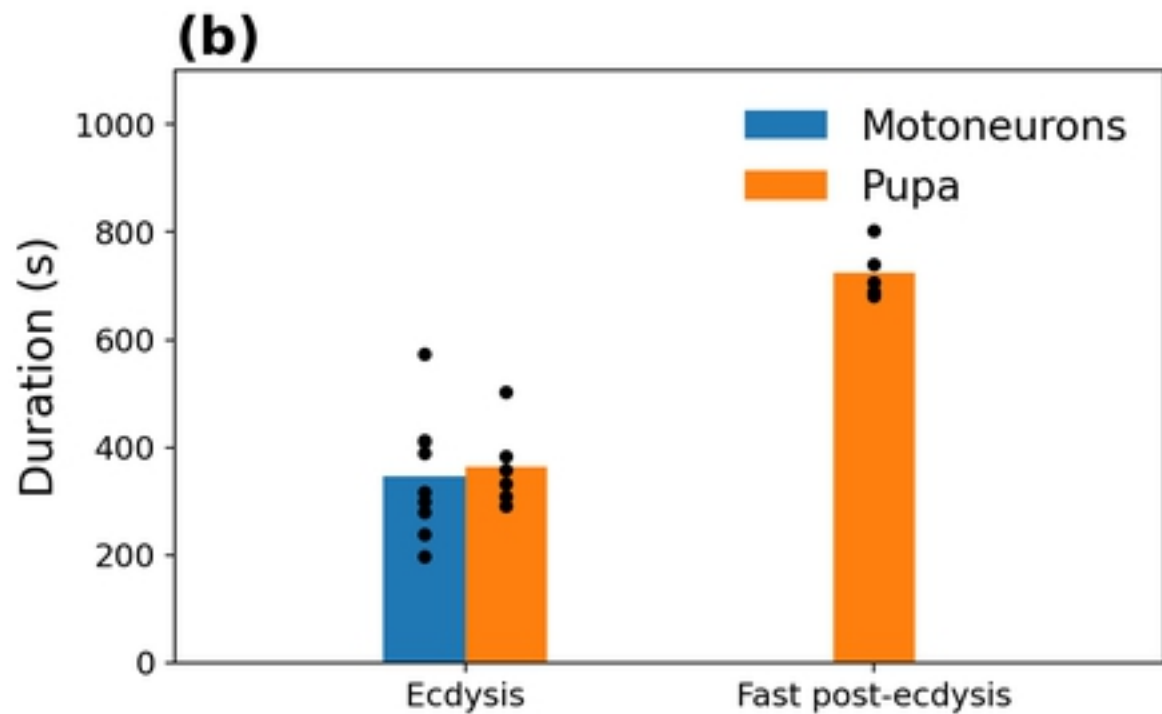

Figure 11
